1

2

## **Kazrin is an endosomal adaptor for dynein/dynactin**

3

Ines Hernandez-Perez<sup>1</sup>, Adrian Baumann<sup>1</sup>, Javier Rubio<sup>1</sup>, Henrique Girao<sup>1,2</sup>, Elena

4

Rebollo<sup>1</sup>, Anna M. Aragay<sup>1,\*</sup> and Maria Isabel Geli<sup>1,\*</sup>

5

<sup>1</sup>Institute for Molecular Biology of Barcelona (IBMB, CSIC), Baldiri Reixac 15, 08028 Barcelona, Spain.

6

\*Correspondence: [mgfbmc@ibmb.csic.es](mailto:mgfbmc@ibmb.csic.es); [aacbmc@ibmb.csic.es](mailto:aacbmc@ibmb.csic.es)

7

ORCID: 0000-0002-3452-6700

8

## 9 **Abstract**

10 Kazrin is a protein widely expressed in vertebrates whose depletion causes a myriad of  
11 developmental defects, in part derived from altered cell adhesion, impaired cell migration  
12 and failure to undergo Epidermal to Mesenchymal Transition (EMT). However, the  
13 primary molecular role of kazrin, which might contribute to all these functions, has not  
14 been elucidated yet. We previously identified one of its isoforms, kazrin C, as a protein that  
15 potently inhibits clathrin-mediated endocytosis when overexpressed. We now generated  
16 kazrin knock out Mouse Embryonic Fibroblasts (MEFs) to investigate its endocytic  
17 function. We found that kazrin depletion delays perinuclear enrichment of internalized  
18 material, indicating a role in endocytic traffic from Early (EE) to Recycling Endosomes  
19 (REs). Consistently, we found that the C-terminal domain of kazrin C, predicted to be an  
20 Intrinsically Disordered Region (IDR), directly interacts with several components of the  
21 EEs, and that kazrin depletion impairs centripetal motility of EEs. Further, we noticed that  
22 the N-terminus of kazrin C shares homology with dynein/dynactin adaptors and that it  
23 directly interacts with the dynactin complex and the dynein Light Intermediate Chain 1  
24 (LIC1). Altogether, the data indicate that one of the primary kazrin functions is to facilitate  
25 endocytic recycling via the perinuclear endocytic compartment, by promoting microtubule  
26 and dynein/dynactin-dependent transport of EEs or EE-derived transport intermediates to  
27 the RE.

28

## 29 INTRODUCTION

30 Kazrin is a highly conserved and broadly expressed vertebrate protein, which was first  
31 identified as a transcript present in human brain (Kikuno et al., 1999). The human kazrin  
32 gene is located on chromosome 1 (1p36.21) and encodes at least seven isoforms (A-F and  
33 K), generated by alternative splicing (Groot et al., 2004; Nachat et al., 2009; Wang et al.,  
34 2009). From those, kazrin C is the shorter isoform that constitutes the core of all other  
35 versions, which bear N or C-terminal extensions. Since its discovery, several laboratories  
36 have reported a broad range of roles for the different kazrin isoforms in a myriad of  
37 experimental model systems. Thus, in humans, kazrin participates in structuring the skin  
38 cornified envelope and it promotes keratinocyte terminal differentiation (Groot et al., 2004;  
39 Sevilla et al., 2008a). In U373MG human astrocytoma cells, kazrin depletion leads to  
40 caspase activation and apoptosis (Wang et al., 2009). In *Xenopus* embryos, kazrin is  
41 important to maintain the ectoderm integrity and its depletion also causes skin blisters,  
42 probably derived from defects in establishing cell-cell contacts (Sevilla et al., 2008b). In  
43 addition, depletion of kazrin causes craniofacial development defects, linked to altered  
44 EMT and impaired migration of neural crest cells (Cho et al., 2011). The subcellular  
45 localization of kazrin recapitulates its functional diversity. Depending on the isoform and  
46 cell type under analysis, kazrin has been reported to associate with desmosomes (Groot et  
47 al., 2004), *adherens* junction components (Cho et al., 2010; Sevilla et al., 2008a), the  
48 nucleus (Groot et al., 2004; Sevilla et al., 2008a), or the microtubule cytoskeleton (Nachat  
49 et al., 2009). At the molecular level, the N-terminus of kazrin, predicted to form a coiled-  
50 coil, directly interacts with several p120-catenin family members (Sevilla et al., 2008b), as  
51 well as with the desmosomal component periplakin (Groot et al., 2004), and it somehow  
52 regulates RhoA activity (Groot et al., 2004; Sevilla et al., 2008a) (Cho et al., 2010). How

53 kazrin orchestrates such many cellular functions at the molecular level is far from being  
54 understood.

55 We previously isolated human kazrin C as a cDNA that when overexpressed potently  
56 inhibits clathrin-mediated endocytosis (Schmelzl and Geli, 2002). In the present work, we  
57 generated kazrin knock out (kazKO) MEFs to analyze its role in endocytic traffic in detail.

58 We found that depletion of kazrin caused accumulation of peripheral EEs and delayed  
59 transfer of endocytosed transferrin (Tfn) to the perinuclear region, where the REs  
60 concentrate. Consequently, cellular functions requiring intact endosomal traffic through the  
61 REs, such as cell migration and cytokinetic abscission, were also altered. Consistent with  
62 its role in endocytic traffic, we found that the kazrin C C-terminal portion, predicted to be  
63 an IDR, interacted with different components of the EEs, it was required to form  
64 condensates on those organelles and it was necessary to sustain efficient transport of  
65 internalized Tfn to the perinuclear region. Further, the N-terminus of kazrin C, which  
66 shared considerable homology with dynein/dynactin adaptors, directly interacted with the  
67 dynactin complex and LIC1, and depletion of kazrin impaired the centripetal motility of  
68 Tfn-loaded EEs. The data thus suggested that kazrin facilitates transfer of endocytosed  
69 material to the pericentriolar RE by acting as a dynein/dynactin adaptor for EEs or EE-  
70 derived transport intermediates.

71

## 72 **RESULTS**

### 73 **Kazrin depletion impairs endosomal traffic**

74 We originally identified kazrin C as a human brain cDNA, whose overexpression causes  
75 the accumulation of the Tfn Receptor (TfnR) at the Plasma Membrane (PM) in Cos7 cells  
76 (Schmelzl and Geli, 2002), suggesting that kazrin might be involved in clathrin-mediated  
77 endocytic uptake from the PM. However, treatment of Cos7 cells with a shRNA directed  
78 against kazrin (shkaz) (Fig. S1A) did not inhibit endocytic internalization but it rather  
79 increased the accumulation of Texas Red-Tfn (TxR-Tfn) upon a 2 hour exposure to the  
80 ligand (Fig. S1B & C), indicating that depletion of kazrin either exacerbated endocytic  
81 uptake or inhibited endocytic recycling. The distribution of TxR-Tfn labeled endosomes  
82 was also altered in the shkaz treated cells, as compared with that of untreated cells or cells  
83 transfected with a control shRNA (shCTR). In WT and shCTR treated cells, TxR-Tfn  
84 accumulated in the perinuclear region, where the RE is located, as previously described  
85 (Mellman, 1996). In contrast, TxR-Tfn labelled endosomes appeared more scattered  
86 towards the cell periphery in shkaz treated cells (Fig. S1B & C). The accumulation of  
87 endocytosed material at the periphery suggested that kazrin might play a post-  
88 internalization role in the endocytic pathway, possibly in the transport of material towards  
89 the perinuclear RE.

90 shRNA transfection in Cos7 cells did not achieved complete kazrin depletion in a  
91 reproducible manner and it hampered complementation. To overcome these problems, we  
92 generated kazrin knockout MEFs (kazKO MEFs) using the CRISPR CAS9 technology and  
93 we used a lentiviral system to subsequently create two cell lines that expressed GFP or  
94 GFP-kazrin C upon doxycycline induction (Fig. S1D). Immunoblot analysis demonstrated  
95 that the expression level of GFP-kazrin C in the absence of doxycycline or upon a short o/n

96 (up to 12 hour) incubation was similar to that of the endogenous kazrin (low expression, 1  
97 to 4 times the endogenous kazrin expression level) (Fig. S1E). Under these conditions, the  
98 GFP-kazrin C was barely detectable by fluorescence microscopy (Fig. S1F). This might  
99 explain why none of the commercially available or home-made anti-kazrin antibodies  
100 detected a specific signal in Wild Type (WT) MEFs. Doxycycline incubation for longer  
101 periods (up to 24 hours induction) resulted in moderate expression (4 to 8 times the  
102 endogenous kazrin expression levels) (Fig. S1E), but allowed us to clearly visualize its  
103 localization by microscopy (Fig. S1F).

104 To better discern on the possible effects of kazrin depletion on endocytic uptake or in  
105 subsequent trafficking events, WT and kazKO cells were exposed to a short, 10 minutes  
106 incubation with TxR-Tfn, fixed, and analyzed. Under these experimental conditions, no  
107 differences in the amount of internalized TxR-Tfn were observed between WT and kazKO  
108 cells (Fig. S1G & H), suggesting that kazrin did not play a relevant role in the formation of  
109 endocytic vesicles from the PM, but it might rather work downstream in the pathway. In  
110 agreement with this view and with the Cos7 shRNA data, kazKO MEFs accumulated TxR-  
111 Tfn in the periphery in a perinuclear enrichment assay, whereas the endocytosed cargo  
112 accumulated in the perinuclear region in most WT cells (Fig. 1A & B). Perinuclear  
113 accumulation of TxR-Tfn was restored by low, physiological expression of GFP-kazrin C  
114 but not GFP (Fig. 1A & B), indicating a direct role of kazrin in the process. No significant  
115 difference between the kazKO and the kazKO GFP-expressing cells could be detected in  
116 these experiments. Therefore, in order to simplify the experimental design, further assays  
117 were normalized to the most accurate isogenic kazKO background, namely the kazKO cells  
118 when comparing to the WT, and the kazKO GFP expressing cells when compared to  
119 kazKO MEF expressing GFP-kazrin C.

120 To evaluate if the scattering of TxR-Tfn endosomes was due a defect in the transfer of  
121 material from the EEs to the RE or if it was caused by the dispersal of the RE, we analyzed  
122 the distribution of the EE and the RE markers EEA1 (Early Endosome Autoantigen 1) and  
123 RAB11 (Ras-Related in Brain 11), respectively. We observed that kazKO MEFs  
124 accumulated peripheral, often enlarged, EEA1 positive structures (Fig. 1C & D). The  
125 perinuclear distribution of the RE, was however not significantly affected in the knock out  
126 cells (Fig. S1I & J). Again, low expression of GFP-kazrin C but not GFP recovered the  
127 EEA1 perinuclear distribution (Fig. 1C & D). The data thus suggested that kazrin promotes  
128 transfer of endocytosed material towards the perinuclear region, where the RE is located.  
129 Consistent with a role of kazrin in endocytic traffic towards the perinuclear RE, recycling  
130 of TxR-Tfn back to the PM was diminished in kazKO cells (Fig. 1E), albeit traffic back to  
131 the surface was not blocked. A complete block in recycling was not to be expected because,  
132 in addition to the RAB11 route, the TfnR can take a RAB4-dependent shortcut to the PM  
133 (Sheff et al., 2002). As for the perinuclear Tfn enrichment assays, expression of GFP-kazrin  
134 C but not GFP restored the recycling defects installed in the kazKO MEF (Fig. 1E).  
135 To further confirm the specific role of kazrin in endocytic recycling via the perinuclear RE,  
136 we analyzed its implication in cellular processes that strongly rely on this pathway, such as  
137 cell migration and invasion (Wilson et al., 2018). Analysis of the migration of single WT  
138 and kazKO cells through Matrigel demonstrated that depletion of kazrin significantly  
139 diminished the migration speed, which, similar to endocytic traffic, was recovered upon re-  
140 expressing GFP-kazrin C at low levels, but not GFP (Fig. 2A & B, movie S1). We also  
141 observed an increased persistency in kazKO cells (Fig. S2A), but it was not recovered with  
142 GFP-kazrin C re-expression (Fig. S2A). Increased persistency might be a secondary effect  
143 caused by the trafficking block to the RE, which might accelerate recycling via the shortcut

144 circuit, as previously observed (Perrin et al., 2013; White et al., 2007). The long recycling  
145 circuit also plays an important role in the last abscission step during cytokinesis (Pollard  
146 and O'Shaughnessy, 2019; Wilson et al., 2005). Consistent with kazrin playing a role in that  
147 pathway, kazKO cells had a significant delay in cell separation after cytokinesis, which was  
148 again restored by GFP-kazrin C expression (Fig. 2C & D and movie S2).

149 **Kazrin is recruited to EEs and directly interacts with components of the endosomal**  
150 **machinery through its C-terminal predicted IDR**

151 Next, we investigated whether endogenous kazrin was present on EEs. For that purpose, we  
152 initially used subcellular fractionation and immunoblot because the endogenous protein was  
153 not detectable by fluorescence microscopy, nor was GFP-kazrin C expressed at  
154 physiological levels. As shown in figure 3A, endogenous kazrin neatly co-fractionated in  
155 the lightest fractions with EE markers such as the tethering factor EEA1 (Early Endosome  
156 Antigen 1) and EHD (Eps15 Homology Domain) proteins, most likely corresponding to  
157 EHD1 and EHD3. On the contrary, it only partially co-fractionated with an early-to-late  
158 endosome marker (Vacuolar Protein Sorting 35 ortholog, VPS35) and did not with markers  
159 of recycling endosomes (RAB11) or the Golgi apparatus (Golgi Matrix protein 130,  
160 GM130) (Fig. 3A). Moderately overexpressed GFP-kazrin C also co-fractionated with EEs,  
161 although it appeared slightly more spread towards the RE and Golgi fractions in the  
162 gradient (Fig. 3A). Endogenous kazrin localization at EE was confirmed by subcellular  
163 fractionation experiments in Cos7 cells (Fig. S2B).

164 To confirm the interaction of kazrin C with endosomes, we immunoprecipitated GFP-  
165 kazrin C from native cellular extracts and probed the immunoprecipitates for a number of  
166 proteins involved in endosomal trafficking. We detected specific interactions of GFP-kazrin  
167 C with EHD proteins, as well as clathrin and  $\gamma$ -adaptin, a component of the Golgi and



168 endosomal clathrin adaptor AP-1 (Adaptor Protein 1) (Fig. 3B). No interaction with the  
169 retromer subunit VPS35, the tethering factor EEA1, or the clathrin adaptors GGA2 (Golgi-  
170 localised Gamma-ear-containing ADP-ribosylation factor-binding 2) or AP-2 (Adaptor  
171 Protein 2) could be demonstrated in immunoprecipitations assays (Fig. 3B), indicating that  
172 kazrin C might preferably bind the machinery implicated in endosomal traffic from EEs to  
173 or through REs (Grant and Caplan, 2008; Perrin et al., 2013). Pull down assays with  
174 purified components indicated that kazrin C can directly interact with EHD1 and EHD3, the  
175 clathrin heavy chain terminal domain and the  $\gamma$ -adapting ear (Fig. 3C). Pull down assays  
176 from cell extracts indicated that the EHD proteins and the AP-1 complex bind to the C-  
177 terminus of kazrin C, predicted to be an IDR, but not to the N-terminus (Fig. 3D & E).  
178 Most interacting partners for kazrin were previously defined to bind its N-terminal region  
179 predicted to form a coiled-coil (Groot et al., 2004; Sevilla et al., 2008b). The interaction of  
180 endogenous kazrin with  $\gamma$ -adapting and clathrin could also be confirmed in co-  
181 immunoprecipitation experiments from Cos7 and MEFs, using a polyclonal antibody  
182 against the C-terminus of kazrin C (Fig. S2C). Also consistent with kazrin specifically  
183 interacting with EEs, we found that purified kazrin C interacted with Phosphatidylinositol  
184 3-Phosphate (PI3P) (Fig. 3F), a lipid particularly enriched on EEs (Wang et al., 2019). The  
185 interaction required the polyK stretch in the C-terminus of kazrin C (Fig. 3E), previously  
186 proposed to constitute a nuclear localization signal (Groot et al., 2004). The data suggested  
187 that the C-terminal predicted IDR of kazrin C bears binding sites for multiple EE  
188 components, and therefore, it might be required for its EE recruitment and its function in  
189 endosomal traffic.

190 To investigate the role of the C-terminal region of kazrin C in its recruitment to endosomes  
191 and its function in endocytic traffic, we generated kazKO cells expressing a GFP-kazrin C

192 construct lacking the C-terminal predicted IDR (lacking amino acids 161 to 327) (kazKO  
193 GFP-kazrin C-Nt) using the lentivirus system (Fig. S3A). We then compared its subcellular  
194 localization and its capacity to complement the kazKO endocytic defects with those of the  
195 full length GFP-kazrin C. As shown in figure 4A, moderately expressed GFP-kazrin C  
196 mostly associated with the microsomal fraction containing the EEs, and it was relatively  
197 scarce in the cytosol. In contrast, GFP and GFP-kazrin C-Nt appeared more enriched in the  
198 cytosolic fraction devoid of membranes (Fig. 4A), indicating that the C-terminal predicted  
199 IDR, which binds PI3P,  $\gamma$ -adaptin and EHD proteins, might be required to bring kazrin to  
200 cellular membranes. Next, we proceeded to image cells expressing moderate levels of GFP-  
201 kazrin C and GFP-kazrin C-Nt, upon loading of the EE with TxR-Tfn at 16°C. The  
202 previously reported localization of kazrin C in the nucleus and at cell-cell contacts was  
203 evident in these cells (Fig. 4B and S3B; (Groot et al., 2004)). At the PM, GFP-kazrin C  
204 neatly co-localized with the *adherens* junction components N-cadherin,  $\beta$ -catenin and  
205 p120-catenin, but not with desmoglein, a desmosomal cadherin (Fig. S3B). In addition to  
206 the previously reported localizations, GFP-kazrin C concentrated in small condensates,  
207 which associated with the surface of the TxR-Tfn labeled endosomes (Fig. 4B & C and  
208 movies S3 to S6). Co-localization of GFP-kazrin C condensates with EHD-labeled  
209 structures could also be observed in the cell periphery (Fig. S3C and movies S7 to S10).  
210 GFP-kazrin C-Nt and GFP staining at similar expression levels appeared mostly cytosolic,  
211 with nearly no visible (GFP) or scarce (1 or 2, GFP-kazrin C-Nt) condensates per cell (Fig.  
212 4B & C and movies S11 to S16). The few GFP-kazrin C-Nt condensates observable did not  
213 appear associated with TxR-Tn loaded endosomes (Movies S11 to S14).

214 The data thus indicated that the C-terminal predicted IDR was required to recruit kazrin C  
215 to endosomal membranes and consequently, it should be required to sustain its function in  
216 endosomal traffic, provided that it played a direct role in the process. To test this  
217 hypothesis, we investigated the capacity of GFP-kazrin C-Nt to restore the traffic of TxR-  
218 Tfn to the perinuclear region in the kazKO cells, as compared to the full length kazrin C.  
219 As shown in figures 4D and E, GFP-kazrin C significantly increased the perinuclear  
220 enrichment of TxR-Tfn in a kazKO background upon a 10 minute uptake, as compared to  
221 GFP expression, whereas GFP-kazrin C-Nt did not.

222 **Kazrin C localizes at the pericentriolar region and directly interacts with dynactin**  
223 **and LIC1.**

224 Interestingly, we observed that in most cells expressing GFP-kazrin C, one or two very  
225 bright condensates embracing EE were visible in the perinuclear region (Fig. 5A). Neat co-  
226 localization of the bright perinuclear GFP-kazrin C condensates with pericentrin  
227 demonstrated that GFP-kazrin C accumulated in the pericentriolar region (Fig. 5B). Live-  
228 cell imaging evidenced small GFP-kazrin C condensates moving in and out from the  
229 pericentriolar region (Fig. S3D and movie S17). These structures were reminiscent of  
230 pericentriolar satellites, which are IDR-enriched membrane-less compartments that  
231 transport centrosomal components in a microtubule-dependent manner (Prosser and  
232 Pelletier, 2020). Treatment with the microtubule depolymerizing drug nocodazole disrupted  
233 the perinuclear localization of GFP-kazrin C, as well as the concomitant perinuclear  
234 accumulation of EE (Fig. 5C & D), indicating that EEs and GFP-kazrin C localization at  
235 the pericentrosomal region required minus end directed microtubule-dependent transport,  
236 mostly effected by the dynactin/dynein complex (Flores-Rodriguez et al., 2011).

237 Our observations indicated that kazrin C can be transported in and out of the pericentriolar  
238 region along microtubule tracks, and that it is required for the perinuclear accumulation of  
239 EEs. Interestingly, pericentriolar localization of GFP-kazrin C was reminiscent of that  
240 observed for well-established or candidate dynein/dynactin activating adaptors such as  
241 hook2 or hook3 (Baron and Salisbury, 1988; Szebenyi et al., 2007). Indeed, kazrin C shared  
242 23.3% identity and 57.3 % similarity with BICDR1 (BICauDal Related protein 1) (Fig. 5E),  
243 over 232 amino acids, and 19.6% identity and 61.3 % similarity with hook3, over 168  
244 amino acids. Such similarity was in the range of that shared between hook3 and BICDR1  
245 (24.7% identity and 56.7 % similarity over 268 amino acids) (LALIGN). Therefore, we  
246 hypothesized that kazrin might also interact with the dynein/dynactin complex and serve as  
247 an endosomal dynein adaptor. Consistent with this hypothesis, we found that moderately  
248 expressed GFP-kazrin C pulled-down the dynactin component p150-glued from cell  
249 extracts, whereas GFP alone did not (Fig. 5F). Similar to what has been described for other  
250 dynein/dynactin adaptors (Kendrick et al., 2019), we also detected co-immunoprecipitation  
251 of GFP-kazrin C with plus-end directed motors, specifically, with kinesin-1 (Fig. 5F), a  
252 motor associated with EEs (Loubery et al., 2008). We observed no co-immunoprecipitation  
253 with tubulin (Fig. 5F), indicating that GFP-kazrin C interactions with dynactin and kinesin-  
254 1 were not indirectly mediated by microtubules. Pull down experiments with GST-kazrin  
255 C, expressed and purified from *E. coli*, and the dynactin complex, purified from pig (Jha et  
256 al., 2017), demonstrated that the interaction was direct and that it was contributed by both,  
257 the N- and C-terminal halves of kazrin C (Fig. 5G), suggesting multiple contacts with  
258 different dynactin components. As also described for other dynein/dynactin adaptors such  
259 as BICD2, CRACR2a (Calcium Release Activated Channel Regulator 2a) and hook3 (Lee  
260 et al., 2020), pull down experiments with purified components evidenced a weak, albeit

261 specific interaction of kazrin C with the dynein LIC1, but not with LIC2 (Fig. 5H). Finally,  
262 immunoprecipitation experiments from MEFs using the polyclonal antibody against the C-  
263 terminus of kazrin C also suggested binding of endogenous kazrin with the dynactin  
264 complex (Fig. 5I).

265 Our data indicated that kazrin might act as a new endosomal dynein/dynactin adaptor, with  
266 its C-terminal IDR working as a scaffold that entraps EE or certain EE subdomains through  
267 multiple low affinity binding sites. To directly test this hypothesis we applied high speed  
268 live-cell fluorescence imaging to visualize the movement of TxR-Tfn-loaded EEs in WT  
269 and kazKO cells. As previously described, EEs in WT cells were highly motile exhibiting  
270 long range trajectories of several micrometers, followed by more confined movements  
271 within a 1  $\mu\text{m}$  radius (Flores-Rodriguez et al., 2011; Loubery et al., 2008) (Movie S18).  
272 Kymographs of maximum intensity Z-stack projections of 90 seconds movies evidenced  
273 the linear endosomal trajectories in WT cells, with an average length of about 5  $\mu\text{m}$  (Fig.  
274 6A & B). However, in kazKO MEFs, the kymographs showed profusion of bright dots as  
275 compared to the straight trajectories in the WT, and the length of the straight trajectories  
276 (longer than 1  $\mu\text{m}$ ) was significantly reduced (Fig. 6A & B and movies S18 & S19). These  
277 observations suggested that the absence of kazrin reduced the association of EEs with some  
278 microtubule-dependent motors and/or diminished the processivity of those (Fig. 6A & B).  
279 Analysis of the maximum instantaneous velocities ( $V_i$ ) of centripetal trajectories longer  
280 than 1  $\mu\text{m}$ , mostly contributed by dynein (Flores-Rodriguez et al., 2011; Loubery et al.,  
281 2008), showed that those were lower in the kazKO cells, as compared to the WT (Fig. 6C &  
282 movies S18 to S19). Finally, and also supporting the view that kazrin directly contributes to  
283 EE centripetal transport, we observed that expression of GFP-kazrin C, but not expression  
284 of the truncated version lacking the C-terminal endosomal binding region (GFP-kazrin C-

285 Nt) nor GFP alone, rescued the endosome motility defects installed by depletion of kazrin  
286 (Fig. 6A to C, and movies S21 to S22).

## 287 **Discussion**

288 Our data suggests the kazrin plays a primary role in endosomal recycling through the long  
289 pathway traversing the perinuclear region, and that it does so by working as a  
290 dynein/dynactin adaptor for EEs or EE-derived transport intermediates. We showed that the  
291 predicted kazrin IDR directly interacts with several EE components implicated in endocytic  
292 traffic (Grant and Caplan, 2008; Perrin et al., 2013) and that depletion of kazrin causes a  
293 defect in the transport of endocytosed Tfn to the perinuclear region, as well as the scattering  
294 of EEs but not REs to the cell periphery. These phenotypes recapitulate those observed  
295 when depleting other proteins involved in EE to RE transport such as EHD3, or upon  
296 inhibition of dynein (Driskell et al., 2007; Naslavsky et al., 2006; Nielsen et al., 1999). We  
297 also showed that kazrin shares considerable homology to dynein/dynactin adaptors and that  
298 its depletion or deletion of its IDR impairs movement of Tfn-loaded endosomes towards the  
299 perinuclear region.

300 While the vesicular nature of membrane traffic from the PM to the EE has been well  
301 characterized, the principles governing the transport of membranes and cargo within the  
302 endosomal system are much less understood. The more accepted view is that the core of the  
303 EEs, receiving the internalized material, undergoes a maturation process that leads to its  
304 conversion to LEs, while retrograde traffic is driven by tubular transport intermediates,  
305 generated by sortinexins (SNX) or clathrin coated vesicles (Haberg et al., 2008; Hsu et al.,  
306 2012; McNally and Cullen, 2018). In addition, centripetal transport of EEs to the  
307 pericentriolar region has been proposed to facilitate fusion with or maturation to REs  
308 (Naslavsky and Caplan, 2018; Solinger et al., 2020).

309 Within this wide range of endosomal trafficking events, microtubules seem to play key  
310 roles. EEs move along microtubule tracks with a bias toward the cell center (Driskell et al.,  
311 2007; Nielsen et al., 1999). Centripetal movement is mainly effected by the  
312 dynein/dynactin complex (Granger et al., 2014). Treatment of cells with nocodazol, or  
313 interfering with dynein, results in inhibition of endosome motility, the scattering of EEs to  
314 the cell periphery and impaired endosomal maturation (Granger et al., 2014). In addition,  
315 plus and minus-end directed microtubule-dependent-motors have both a role in maintaining  
316 the endosomal subdomain organization and in the formation and motility of SNX-  
317 dependent tubular structures (Granger et al., 2014). Interestingly, motility of different SNX  
318 tubules or endosomal subdomains is associated with distinct dynein complexes bearing  
319 either the LIC1 or LIC2 chains and particular kinesin types (Hunt et al., 2013). In this  
320 context, the interactome of kazrin C suggests that it might work as a LIC1-dynein and  
321 kinesin-1 adaptor for EHD and/or AP-1/clathrin transport intermediates emanating from  
322 EEs, in transit to the RE (Grant and Caplan, 2008; Perrin et al., 2013). Hook1 and Hook3,  
323 as components of FHF (Fused Toes-Hook-Fused toes and Hook Interacting Protein)  
324 complexes, have also been proposed to work as EEs dynein/dynactin adaptors in yeast, fruit  
325 flies and mammalian cells ((Olenick and Holzbaur, 2019; Xiang and Qiu, 2020; Xiang et  
326 al., 2015) and references therein). However, the interactome of the mammalian hook1 and  
327 hook3 and the endocytic pathways affected by interfering with their function differ from  
328 those of kazrin (Christensen et al., 2021; Guo et al., 2016; Maldonado-Baez and Donaldson,  
329 2013; Olenick et al., 2019; Xu et al., 2008).

330 The role of kazrin in endocytic recycling might explain some of the pleiotropic effects  
331 observed in vertebrate development upon its depletion. Defects in the establishment of cell-  
332 cell contacts in *Xenopus* embryos and human keratynocytes (Cho et al., 2010; Sevilla et al.,

333 2008a; Sevilla et al., 2008b) might derive from altered recycling of cadherins or  
334 desmosomal components (Kawauchi, 2012). Indeed, depletion of kazrin in *Xenopus laevis*  
335 leads to decreased levels of E-cadherin, which can be reverted by inhibiting endocytic  
336 uptake (Cho et al., 2010). This observation is consistent with a role of kazrin diverting  
337 traffic of internalized E-cadherin away from the lysosomal compartment and back to the  
338 PM. Likewise, eye and craniofacial defects associated with reduced EMT and neural crest  
339 cell migration (Cho et al., 2011), might originate from altered endocytic trafficking of  
340 integrins, cadherins and/or signaling receptors (Cadwell et al., 2016; Jones et al., 2006;  
341 Wilson et al., 2018).

342 It is worth noticing that kazrin is only expressed in vertebrates, whose evolution is linked to  
343 an explosion in the number of cadherin genes and the appearance of desmosomes (Green et  
344 al., 2020; Gul et al., 2017). In this context, it is tempting to speculate that while the core  
345 machinery involved in membrane traffic is largely conserved from yeast to humans,  
346 vertebrates might have had the need to develop specialized trafficking machinery such as  
347 kazrin, which spatiotemporally regulates the function of particular adhesion complexes.  
348 Therefore, kazrin might turn out to be a valid therapeutic target to selectively modulate the  
349 function of those adhesion complexes in the context of a myriad of human pathologies  
350 (Kaszak et al., 2020; Yuan and Arikath, 2017). Identification of the relevant endocytic  
351 cargo travelling in a kazrin-dependent manner will be the next step to further understand  
352 the molecular, cellular and developmental functions of kazrin.

## 353 **MATERIALS AND METHODS**

354 **DNA techniques and plasmid construction.** Oligonucleotides used for plasmids  
355 construction and information about the construction strategies are available upon request.  
356 DNA manipulations were performed as described (Sambrook et al., 1989), or with the



357 Getaway cloning system (Life Technologies) in the case of lentiviral vectors. Enzymes for  
358 molecular biology were obtained from New England Biolabs. Plasmids were purified with  
359 the Nucleospin plasmid purification kit (Macherey-Nagel). Linear DNA was purified from  
360 agarose gels using the gel extraction kit from Qiagen. Polymerase Chain Reactions (PCRs)  
361 were performed with the Expand High Fidelity polymerase (Roche) and a TRIO-  
362 thermoblock (Biometra GmbH). Plasmids used are listed in Table I.

363 **Cell culture and cell line establishment.** Cos7 cells were obtained from the German  
364 Collection of Microorganisms and Cell Cultures (<https://www.dsmz.de/dsmz>). MEF and  
365 HEK293T cells were provided by A. Aragay (IBMB-CSIC). Cells were grown in DMEM  
366 (Thermo Fisher) supplemented with 10 % FBS, 100  $\mu$ /ml penicillin, 100  $\mu$ g/ml  
367 streptomycin and 2 mM L-glutamine (Thermo Fisher) in a humidified 5 % CO<sub>2</sub> atmosphere  
368 at 37°C. Cos7 were transiently transfected with Lipofectamine 2000 (Thermo Fisher). Cells  
369 were analyzed 24 hours after transfection. For shRNA kazrin depletion, pKLO.1\_shKaz  
370 from Merck Mission Library 2007 (Clone ID TRCN000018283) was used.  
371 pLKO.1\_CV/\_SCR (SHC002) was used as a control. For lentivirus production and Cos7  
372 cells transfection, HEK293T cells were co-transfected with either the pLL3.7 encoding  
373 GFP, for virus production control and infection efficiency monitoring, or with pLKO.1  
374 encoding the desired shRNA, and the viral packaging (pCMV-dR8.2 dvpr) and envelope  
375 (pCMV-VSV-G) plasmids, using calcium phosphate transfection. About 16 hours after  
376 transfection, the medium was changed and half of the usual volume was added. During the  
377 two following days, medium containing the virus was collected and filtered with a 0.45  $\mu$ m  
378 filter (Millipore). The filtered virus solution was directly used for the infection of cell lines  
379 or stored in aliquots at -80°C without prior concentration of the virus. Infection and  
380 selection of stably infected cells were done in the presence of the appropriate concentration

381 of puromycin (Merck-Aldrich), titrated by using the minimum antibiotic concentration  
382 sufficient to kill untransfected cells, but to maintain cells transfected with the pLL3.7 GFP-  
383 containing plasmid. Actual depletion of kazrin or the protein of interest was analyzed by  
384 immunoblot using home-made polyclonal rabbit antibodies raised against the N- (amino  
385 acids 1 to 176) and C- terminal (amino acids 161 to 327) portions of kazrin C.  
386 MEF KO cells were produced with the CRISPR-CAS9 system. Two guide RNAs were  
387 designed to recognize regions at the start of exon 2 of the kazrin gene, corresponding to the  
388 start of kazrin C isoform (CACCGAATGCTGGCGAAGGACCTGG and  
389 CACCGCCTTCTGTACCAGCTGCACC). Online tools Benchling  
390 (<https://www.benchling.com/>) and the Broad Institute tool GPP  
391 (<https://portals.broadinstitute.org/gpp/public/analysis-tools/sgrna-design>) were used for the  
392 design. Guide RNA oligonucleotides were annealed and inserted into a pSpCas9(BB)-2A-  
393 GFP pX458 vector. MEFs were electroporated with Nucleofector (Lonza), following the  
394 manufacturer's instructions. GFP-positive cells were sorted by FACS in an Aria FUSION  
395 (Becton Dickinson) sorter and screened by immunoblotting with antibodies against the N-  
396 terminal and the C-terminal portions of kazrin. Lentiviral particles were produced in HEK  
397 293T cells. Calcium phosphate-mediated transfection was used to deliver vector  
398 pINDUCER20 encoding GFP or GFP-tagged kazrin constructs, together with packaging  
399 and envelope lentiviral vectors. The supernatant of transfected HEK 293T cells was  
400 collected after 16 hours, 0.45  $\mu$ m-filtered and added to MEFs. The cells were passaged for  
401 a week, incubated with 5  $\mu$ g/ml doxycycline (Millipore) for 48 hours to induce the  
402 expression of the construct. GFP-positive cells were selected by FACS and pooled. MEFs  
403 were transfected by electroporation using the Ingenio solution (Mirus) and a nucleofector  
404 (Amaxa). The cells were processed 2 days after electroporation.

405 For complementation assays, GFP, GFP-kazrin C and GFP-kazrin C-Nt were induced for  
406 up to 12 hours to achieve low, nearly-physiological expression levels of GFP-kazrin C (as  
407 compared to endogenous kazrin by immunoblot, using the home-made rabbit polyclonal  
408 anti-kazrin serums), and analogous expression levels of GFP or GFP-kazrin C-Nt (as  
409 compared by immunoblot using the mouse anti-GFP antibody (see antibodies section)). For  
410 GFP-kazrin C imaging or biochemical studies, cells were induced for up to 24 hours to  
411 achieve analogous, moderately-overexpressed levels of the proteins. To study the effect on  
412 microtubule dynamics, MEFs were treated with 100 ng/ml of nocodazole (Merck) or  
413 DMSO for 16 h, and then fixed at room temperature.

414 **TxR-Tfn accumulation, perinuclear enrichment, and recycling assays.** Cos7 cells or  
415 MEFs were grown on R-collagen-coated glass coverslips. For all assays, cells were starved  
416 30 minutes in DMEM without FBS or BSA. For the accumulation assays, cells were then  
417 incubated with pre-warmed DMEM containing 20 µg/ml of TxR-Tfn (from human serum,  
418 Molecular Probes) and 0.1 % BSA for the specified times. Cells were washed in ice-cold  
419 PBS once and fixed in 4 % PFA (Merck) for 20 minutes on ice. For the TxR-Tfn  
420 perinuclear enrichment and recycling assays, 20 µg/ml of TxR-Tfn in DMEM with 0.1 %  
421 BSA was added and cells were incubated at 16 °C for 30 minutes to load EEs. Cells were  
422 then washed in ice-cold PBS with 25 mM acetic acid pH 4.2, and with PBS and  
423 subsequently incubated with 500 µg/ml unlabeled Tfn (Merck) in DMEM with 0.1 % BSA  
424 at 37 °C. Cells were then transferred to ice at the indicated time points, washed in ice-cold  
425 PBS with 25 mM acetic acid pH 4.2 and with PBS, and fixed in 4 % PFA for 20 minutes on  
426 ice. For the perinuclear enrichment assays the mean TxR-Tfn fluorescence intensity within  
427 a 10 µm diameter circle in the perinuclear region was divided by the signal in the whole  
428 cell selected with the Fiji free hand tool to define the ROI (Region Of Interest), at 10

429 minutes chase, after background subtraction. For recycling experiments the mean  
430 fluorescence intensity per cell was measured using the Fiji free hand drawing tool to select  
431 the ROI at the indicated time points and the signal was normalized to the average intensity  
432 at time 0.

433 For TxR-Tfn accumulation, perinuclear enrichment and recycling assays, images were  
434 taken with a Zeiss LSM780 confocal microscope equipped with a 63x oil (NA = 1.4)  
435 objective, a GaAsP PMT detector 45% QE and images were acquired at pixel size 0.06  $\mu\text{m}$ ,  
436 unless otherwise indicated. For the experiments shown in figure 4D, an Andor Dragonfly  
437 spinning disk microscope equipped with a 100x oil (NA = 1.49) objective and a Sona 4.2  
438 B11 sCMOS camera 95% QE was used. Images were acquired at pixel size 0.05  $\mu\text{m}$ .

#### 439 **Colocalization of GFP-kazrin and TxR-Tfn and immunofluorescence**

440 3D reconstructions of EEs loaded with TxR-Tfn in cells expressing GFP, GFP-kazrin C or  
441 the GFP-kazrin C-Nt were performed with voxel size 0.05 x 0.05 x 0.10  $\mu\text{m}$ , compiled with  
442 the Andor Dragonfly spinning disk microscope equipped with a 100x oil (NA = 1.49)  
443 objective and a Sona 4.2 B11 sCMOS camera 95% QE, in cells treated as for the TxR-Tfn  
444 recycling assay, immediately upon the shift from 16°C to 37°C. 3D movies of 5 x 5  $\mu\text{m}^2$   
445 were generated with the Fiji 3D reconstruction tool. A 1.0 Gaussian blur filter was applied  
446 to the images after performing the 3D reconstruction. For immunofluorescence  
447 experiments, cells were seeded onto cover-glasses and fixed with 4 % PFA in PBS  
448 containing 0.02 % BSA and 0.02 % sodium azide (PBS\*), for 10 minutes at room  
449 temperature. Cells were washed 3 times for 5 minutes with PBS\* and permeabilized with  
450 PBS\* containing 0.25 % Triton X-100 for 10 min. Cells were washed 3 times for 5 minutes  
451 with PBS\* and incubated for 20 minutes in PBS\* containing 1 % BSA. Cells were then  
452 incubated in the presence of the primary antibody in PBS\* for 1 hour at room temperature,

453 washed 3 times with PBS\* and incubated for 1 hour in the presence of the secondary  
454 antibodies prepared in PBS\*. Cells were washed 3 times with PBS\* and mounted using  
455 Prolong Gold that included DAPI for nuclear staining (Thermo Fisher). Images were taken  
456 with a Zeiss LSM780 confocal microscope equipped with a 63x oil (NA = 1.4) objective, a  
457 GaAsP PMT detector 45% QE, and images were acquired at pixel size 0.06  $\mu\text{m}$  for the  
458 experiments shown in figures 5B and C and 0.120  $\mu\text{m}$  for the experiments shown in figure  
459 5A. Images shown in figure S3B and the associated movies for the 3D reconstruction of  
460 EHD labeled endosomes, were performed with the Andor Dragonfly spinning disk  
461 microscope equipped with a 100x oil (NA = 1.49) objective and a Sona 4.2 B11 sCMOS  
462 camera 95% QE, with voxel size 0.05 x 0.05 x 0.10  $\mu\text{m}$ . Experiments shown in figure S3B  
463 were acquired with a Leica TCS-SP5 confocal microscope equipped with a 63x oil  
464 objective (NA = 1.4), with a pixel size of 0.06  $\mu\text{m}$ . Perinuclear enrichments for EEA1 and  
465 RAB11 in MEFs were calculated after background subtraction as the mean fluorescence  
466 intensity within a 10 and 9  $\mu\text{m}$  (respectively) diameter circle in the perinuclear region,  
467 divided by the mean intensity in the whole cell, as delimited with the Fiji free hand drawing  
468 tool to select the ROI.

469 **Cell migration and division assays.** Cells were plated on 400  $\mu\text{g/ml}$  Matrigel (Corning)-  
470 coated plates at low density and incubated for 5 hours. Once the cells were attached, the  
471 medium was replaced by Matrigel for 30 minutes to embed the cells in a matrix. Matrigel  
472 excess was then removed and cells were kept at 37 °C with 5 % CO<sub>2</sub> during imaging. Phase  
473 contrast images were taken every 10 minutes for a total of 9 hours with a motorized  
474 bright field Leica AF7000 microscope equipped with a 10x objective (NA = 0.3), and a  
475 digital Hamamatsu ORCA-R2 CCD camera and images were taken with a pixel size of  
476 0.64  $\mu\text{m}$ . To analyze cell migration, cells were tracked using the Fiji plugin MTrackJ.

477 Speed and direction persistency was calculated using the open-source program DiPer (Dang  
478 et al., 2013). To detect cytokinesis delay compatible with a defect in abscission, the time  
479 was measured from the moment daughter cells attach to the substrate until they completely  
480 detach from each other.

481 **Live confocal imaging.** Cells were seeded on plates with polymer coverslips for high-end  
482 microscopy (Ibidi). Cells were kept at 37°C with 5 % CO<sub>2</sub> during the imaging. For the  
483 movie S17 and the figure S3C, images were taken every 2.65 seconds on a Zeiss LSM780  
484 confocal microscope equipped with a 63x oil objective (NA = 1.4) for, with voxel size 0.05  
485 x 0.05 x 0.130 μm. To follow EE motility, cells were starved for 30 minutes in DMEM  
486 without FBS and subsequently loaded at 16°C with 20 μg/ml TxR-Tfn in DMEM with  
487 0.1% BSA, as described for the TxR-Tfn recycling experiments. Cells were then rinsed  
488 with PBS and image immediately upon addition of 37°C pre-warmed media loaded with  
489 unlabeled Tfn. Images were compiled with voxel size 0.17 x 0.17 x 0.46 μm for WT and  
490 KO cells and 0.09 x 0.9 x 0.46 μm for GFP GFP-kazrin C and GFP-kazrin C-Nt expressing  
491 cells, and they were taken every 3 seconds for 1.5 minutes using the Andor Dragonfly 505  
492 microscope, equipped with a 60x oil (NA = 1.4) objective and a Sona 4.2 B11 sCMOS  
493 camera 95% QE. Maximum intensity projections of the Z-stacks were generated with Fiji,  
494 after background subtraction and registration using the Linear Stack Alignment with SIFT  
495 tool of Fiji. Movies of 10 x 10 μm<sup>2</sup> were generated from the original movies using the Fiji  
496 crop tool and a 1.0 Gaussian filter was applied. Kymographs of the maximum intensity Z-  
497 stack projections were generated to measure the length of linear trajectories with the Fiji  
498 free hand line tool. Maximum instantaneous velocity ( $V_i$ ) of TxR-Tfn loaded endosomes

499 was measured by manually tracking endosomes moving into the cell center with the Fiji  
500 plugin MTrackJ.

501 **SDS-PAGE and immunoblots.** SDS-PAGE was performed as described (Laemmli, 1970),  
502 using pre-casted Mini-PROTEAN TGX 4-20% Acrylamide gels (Bio Rad). Protein  
503 transfer, blotting and chemiluminescence detection were performed using standard  
504 procedures. Detection of proteins was performed using the ECL kit (GE Healthcare).

505 **Cell fractionation.** Cell fractionation was performed as described in Li and Donowitz  
506 (2014) (Li and Donowitz, 2014). Briefly, cells were scraped from the plate, harvested by  
507 centrifugation at 700 g for 10 minutes and resuspended in 1 ml of ice cold Lysis Buffer  
508 (LB: 25 mM Hepes pH 7.4, 150 mM NaCl, 1 mM DTT, 2 mM EGTA) containing protease  
509 inhibitors. The cell suspension was then passed 10 times through a 27 G needle. The lysate  
510 was cleared by centrifuging twice at 3000 g for 15 min. The supernatant was subsequently  
511 centrifuged at 186000 g for 1 hour at 4°C to fractionate cellular membranes from cytosol.  
512 The membrane pellet was resuspended in LB with protease inhibitors, passed 10 times  
513 through a 27 G needle and laid on an Optiprep (Merck) gradient. A 12 ml 2 % step Optiprep  
514 gradient in LB ranging from 32 % to 10 % was prepared beforehand in Ultra-Clear tubes  
515 (Beckman Coulter). Samples were spun for 16 hours at 100000 g at 4 °C. 0.6 ml fractions  
516 were carefully collected from the top. Samples were then precipitated with trichloroacetic  
517 acid, air-dried and resuspended in SDS-PAGE sample buffer for immunoblot analysis. For  
518 the experiments shown in figure 4A, the supernatant from the 3000 g centrifugation was  
519 adjusted to 1 mg/ml of total protein and centrifuged at 186000 g for 1 hour at 4°C to  
520 fractionate cellular membranes (pellet) from cytosol (supernatant). 15 µg of total protein  
521 from the 3000 g supernatant (total) and the corresponding 1 and 5 equivalents of the

522 cytosolic or membrane fractions were loaded in an SDS-PAGE acrylamide gel and  
523 immunoblotted for EHD proteins or GFP.

524 **GST pull downs, GFP-trap and endogenous immunoprecipitations.** Purification of  
525 recombinant GST and 6-His fusion proteins from BL21 *E. coli* (Novagen) was performed  
526 as described (Geli et al., 2000). Pull down experiments were performed with Glutathione-  
527 Sepharose beads (GE Healthcare) coated with 0.5 µg of the indicated GST-tagged proteins  
528 and 2 nM of eluted 6xHis-kazrin C incubated in 1 ml of binding buffer containing PBS or 2  
529 nM of the dynactin complex in 0.5 ml of DBB (25 mM Tris-HCl pH 8, 50 mM KoAc, 0.5  
530 mM ATP, 1 mM DTT, 1 mM MgCl<sub>2</sub>, 1 mM EGTA and 10 % glycerol), both bearing 0.2 %  
531 Triton-X100 and 0.5 % BSA with protease inhibitors (Complete Roche), for 1 hour at 4 °C  
532 in a head-over-shoulder rotation. Beads were washed 3 times with the corresponding  
533 binding buffer containing Triton-X100 and twice without detergent. The beads were boiled  
534 in Laemmli buffer. Input and pulled-down samples were loaded in an SDS-PAGE gel and  
535 analyzed by immunoblot. For the pull downs from mammalian protein extracts, GST, and  
536 the GST-kazrin C N- (amino acids 1 to 176) and C-terminal (amino acids 161 to 327)  
537 portions were expressed and purified from *E. coli* as described above, using glutathione-  
538 Sepharose beads, and the beads were incubated with the 3000 g supernatant of a non-  
539 denaturing protein extract from WT MEF, prepared as described for the subcellular  
540 fractionation using LB, after adding 1% Triton-X100. After 1 hour incubation, beads were  
541 recovered and washed with LB 1% Triton-X100 3 times and twice with LB buffer. Beads  
542 were resuspended in SDS-PAGE sample buffer and analyzed by immunoblot against EHD  
543 proteins and γ-adaptin.

544 For immunoprecipitations from MEFs, moderately overexpressing GFP and GFP-kazrin C,  
545 the cells were harvested and cleared at 100 g. The pellet was resuspended in 500 µl of IP



546 buffer (20 mM Hepes, 50 mM KAc, 2 mM EDTA, 200 mM sorbitol, 0.1 % Triton X-100,  
547 pH 7.2) containing protease inhibitors and passed 30 times through a 27 G needle. The  
548 lysate was cleared by centrifuging 5 minutes at 10000 g. 10  $\mu$ l of GFP-binding agarose  
549 beads (Chromotek) were incubated with the protein extract for 1 hour at 4 °C in head-over-  
550 shoulder rotation. Beads were washed six times with 1 ml of IP buffer. The beads were  
551 boiled in Laemmli buffer. Input and IP samples were loaded in an SDS-PAGE gel and  
552 analyzed by immunoblot. DBB (25 mM Tris-HCl pH 8, 50 mM KoAc, 0.5 mM ATP, 1  
553 mM DTT, 1 mM MgCl<sub>2</sub>, 1 mM EGTA and 10 % glycerol) containing 0.1 % Triton X-100  
554 was used for the immunoprecipitation experiments with dynactin and kinesin-1.

555 For endogenous immunoprecipitations, WT or kazKO cell extracts were generated as  
556 described above but incubated with rabbit IgGs against the kazrin C C-terminus (aa 161 to  
557 327), pre-bound from a serum to Protein A-Sepharose, or IgGs from the pre-immune  
558 serum. The amount of endogenous kazrin in the immunoprecipitates could not be assessed  
559 because the IgGs interfered with the detection.

560 **Lipid strip assays.** Lipid strips (Echelon) were incubated in 1 % skimmed milk in PBS for  
561 1 hour at room temperature. The corresponding GST fusion protein was added to a final  
562 concentration of 15  $\mu$ g/ml in incubation buffer (10 mM Tris pH 8.0, 150 mM NaCl, 0.1 %  
563 Tween-20, 3 % BSA (fatty acid free, Merck)), with protease inhibitors over night at 4°C.  
564 The strips were washed three times for 10 minutes in the incubation buffer and developed  
565 by immunoblot.

566 **Quantification, statistical analysis and structure prediction.** Quantifications were  
567 performed with the Fiji open source platform (Schindelin et al., 2012). Statistical analysis  
568 was performed with GraphPad Prism. The D'Agostino-Pearson test was applied to data sets  
569 to assess normality. If the data followed a normal distribution or the result of the normality

570 test was not significant, an unpaired two-tailed Student t test was performed to assess  
571 significance. If the distribution was not normal, a two-tailed Mann-Whitney test was used.  
572 Results are expressed as mean  $\pm$  SEM with respect to the number of cells (n) for a  
573 representative experiment. Prediction of IDRs was achieved with the IUPred2A software,  
574 which assigns each residue a IUPred score that is the probability of it being part of a IDR  
575 (Mészáros, Erdős and Dosztányi, 2018).

576 **Antibodies.** Polyclonal sera against kazrin for immunoblotting were generated in rabbit  
577 using an N-terminal (amino acids 1 to 176) and a C-terminal (amino acids 161 to 327)  
578 fragment of kazrin C fused to GST. The following commercial antibodies were used in this  
579 study: anti-RAB11 (610656), anti-RAB4 (610888), anti-rabaptin-5 (610676), anti-GM130  
580 (610822), anti-GGA2 (612612), anti-clathrin heavy chain (610499), anti-p150 Glued  
581 (610473), anti- $\alpha$ -adaptin (610501), anti- $\gamma$ -adaptin (610386), anti-N-cadherin (51-9001943),  
582 anti- $\beta$ -catenin (610153), anti-p120-catenin (51-9002040) and anti-desmoglein (51-  
583 9001952) from BD Biosciences, anti-pericentrin (4448) and anti-EHD1 (109311) from  
584 Abcam, anti-VPS35 (374382) and anti-kinesin-1 heavy chain (133184) from Santa Cruz  
585 Biotechnology, anti-EEA1 (3288) from Cell Signalling Technology, anti-tubulin (T-6557)  
586 from Merck, anti kazrin C (ab74114) from Abcam, anti-GFP (632380) from Living Colors  
587 and anti-GST (27-57701) from Amersham. Peroxidase-conjugated anti-mouse (A2554),  
588 anti-goat (A4174) and rabbit (A0545) IgGs were from Merck. Alexa Fluor 568 anti-mouse  
589 IgG (A11037), Alexa Fluor 568 anti-rabbit IgG (A11036) and Alexa Fluor 647 anti-rabbit  
590 IgG (A21245) from Thermo Fisher.

591

592 **Table I. Plasmids**

| <b>Plasmid</b>              | <b>Insert</b>                                            | <b>Backbone</b>            |
|-----------------------------|----------------------------------------------------------|----------------------------|
| pGEX-5X-3                   | GST                                                      | pGEX-5X-3                  |
| pGST-hB24                   | GST + kazrin C, human gene KIAA1026                      | pGEX-4T-2                  |
| pGST-kaz-Ct (161-327)       | GST + kazrin C Ct (aa 161-327)                           | pGEX-5X-3                  |
| pGST-kaz-Nt (1-176)         | GST + kazrin C Nt (aa 1-176)                             | pGEX-5X-3                  |
| pGST-kaz-Ct-KA              | GST + kazrin C Ct (aa 161-327) -(281-KRKKKK-286, AAAAAA) | pGEX-5X-3                  |
| pQE11-kazrin                | 6xHis + kazrin C                                         | pQE11                      |
| pGST-EHD1                   | GST + EHD1                                               | pGEX-5X-3                  |
| pGST-EHD3                   | GST +EHD3                                                | pGEX-5X-3                  |
| pGST- $\gamma$ -Adaptin-ear | GST + human AP1 Adaptin G1 ear (aa 702-925)              | pGEX-5X-3                  |
| pGST-CHC17-TD               | GST + human CHC17-aa1-483 (CHC TD + linker)              | pGEX-5X-3                  |
| pGST-LIC1                   | GST + dynein light intermediate chain 1                  | pGEX-5X-3                  |
| pGST-LIC2                   | GST + dynein light intermediate chain 2                  | pGEX-5X-3                  |
| pX458-kaz KO 1              | Cas9 and cas9 target sequence 1                          | pSpCas9(BB)-2A-GFP (pX458) |
| pX458-kaz KO 2              | Cas9 and cas9 target sequence 2                          | pSpCas9(BB)-2A-GFP (pX458) |
| pVSV-G                      | Lentivirus envelope protein                              | pLenti-CMV                 |
| pAX8                        | Lentivirus packaging protein                             | pLenti-CMV                 |
| pINDUCER-EGFP               | EGFP                                                     | pINDUCER20                 |
| pINDUCER-EGFP-kazrin C      | EGFP + kazrin C                                          | pINDUCER20                 |
| pINDUCER-EGFP-kazrin C-Nt   | EGFP + kazrin C (aminoacids 1 to 176)                    |                            |
| pKLO.1_shKaz                | cloneID TRCN00001 82832                                  | pLK0.1                     |
| pLK0.1                      | SHC002                                                   | pLK0.1                     |
| pCMV-dR8.2dvpr              |                                                          |                            |

|            |  |  |
|------------|--|--|
| pCMV-VSG-G |  |  |
|------------|--|--|

593

594 **Acknowledgements.** M. Martínez for lentivirus plasmids and J. Roig for CRISPR  
595 plasmids. M. Robinson for sending the construct of the GST- $\gamma$ -adaptin ear and M. Mapelli  
596 for the GST-LIC1 and LIC2 constructs. T. Surrey and C. Mitchel for sharing the porcine  
597 purified dynactin complex. This work was financed by BFU2017-82959-P to MIG, BES-  
598 2012-053341 to AB and BES-2015-071691 to IHP, from the Spanish government. The  
599 Andor Dragonfly 505 and the Zeiss LSM780 microscopes were funded by EQC2018-  
600 004541 EU FeDer and CSIC1501/18, respectively.

601 **FIGURE LEGENDS**

602 **Figure 1. Kazrin depletion impairs endosomal traffic.** (A) Confocal images of WT and  
603 kazKO MEF or kazKO MEF expressing low levels (See M&M) of GFP or GFP-kazrin C  
604 incubated with 20  $\mu$ g/ml TxR-Tfn at 16°C and chased at 37°C for 10 minutes. Scale bar, 10  
605  $\mu$ m. Cell borders are indicated by dashed lines and the nuclei in blue. (B) Mean  $\pm$  SEM  
606 TxR-Tfn perinuclear enrichment for the cells described in A, after 10 minutes incubation  
607 with the probe. The mean fluorescence intensity within a circle of 10  $\mu$ m in the perinuclear  
608 region was divided by the mean signal in the cell. p values of two-tailed Mann-Whitney  
609 tests are shown. n > 58 for each sample. (C) Confocal images of the WT and kazKO MEF,  
610 or kazKO MEF expressing GFP or GFP-kazrin C at low levels, fixed and stained with  $\alpha$ -  
611 EEA1 and A568-conjugated secondary antibodies. Magnified insets showing endosomes in  
612 the peripheral areas for each cell type are shown on the right. Scale bar, 10  $\mu$ m. Cell  
613 borders are indicated with dashed lines and the nuclei in blue. (D) Mean  $\pm$  SEM EEA1  
614 perinuclear enrichment. The mean EEA1 fluorescence intensity within a circle of 10  $\mu$ m in  
615 the perinuclear region was quantified and divided by the mean fluorescence intensity in the

616 cell. The values were normalised to the corresponding kazKO cells (either kazKO or  
617 kazKO GFP). p values of two-tailed Mann-Whitney tests are shown.  $n > 80$  for each  
618 sample. **(E)** Mean  $\pm$  SEM of TxR-Tfn fluorescence intensity per cell in WT and kazKO  
619 MEFs, or kazKO MEFs expressing low levels of GFP and GFP-kazrin C, at the indicated  
620 time points after the cells were incubated 30 minutes with 20  $\mu\text{g/ml}$  TxR-Tfn at 16°C to  
621 allow accumulation of cargo in EEs, washed and released (time 0) with non-labelled Tfn at  
622 37°C, to allow recycling. Data was normalized to the average intensity at time 0. p values  
623 of two-tailed Student t tests are shown.  $n > 16$  per sample and time point.

624 **Figure 2. Kazrin depletion impairs cell migration and division.** **(A)** Paths described by  
625 individually migrating WT and kazKO MEF or kazKO MEFs expressing GFP or GFP-  
626 kazrin C at low levels. The cells were embedded in Matrigel and tracked for 9 hours with a  
627 10 minutes time lapse. All tracks start at the (0,0) coordinate in the graph. **(B)** Mean  $\pm$  SEM  
628 speeds of the cells described in (A). The data was normalized to the mean of the  
629 corresponding KO cells (either kazKO or kazKO expressing GFP). p values of two-tailed  
630 Mann-Whitney tests are shown.  $n > 100$  per condition. **(C)** Time lapse epifluorescence  
631 images of WT and kazKO MEFs or kazKO MEFs expressing GFP or GFP-kazrin C at low  
632 levels, as they divide. Cells were recorded every 10 minutes. **(D)** Mean  $\pm$  SEM time lapse  
633 between substrate attachment and complete cell separation of the cells described in (C). The  
634 data was normalized to the mean of the corresponding KO (kazKO or kazKO expressing  
635 GFP). p values of two-tailed Mann-Whitney tests are shown.  $n > 68$  per condition.

636 **Figure 3. Kazrin is an endosomal protein.** **(A)** Left, immunoblots of an Optiprep density  
637 gradient fractionation of membrane lysates of WT and kazKO MEF or kazKO MEF  
638 moderately (see M & M) expressing GFP or GFP-kazrin C. The membranes were probed  
639 with antibodies against the kazrin C N-terminus, EEA1 and EHD1 (EE markers), VPS35

640 (RAB5/RAB7 transition endosomal marker), RAB11 (RE/Golgi marker), GM130 (*cis*-  
641 Golgi marker) and BIP (Binding Immunoglobulin Protein) (ER marker). The antibody  
642 against EHD1 is like to recognize other EHD proteins. Band intensity plots per fraction for  
643 kazrin or the indicated intracellular membrane markers are shown on the right. The signal  
644 intensities of each fraction were normalized to the maximum for each antibody. All  
645 gradients were loaded with the same amount of total protein. **(B)** Immunoblots of  $\alpha$ -GFP-  
646 agarose precipitates from lysates of kazKO MEF moderately expressing GFP or GFP-  
647 kazrin C, probed with antibodies against the indicated proteins. 10  $\mu$ g of total protein were  
648 loaded as input. **(C)** Immunoblots of pull-downs from glutathione-Sepharose beads coated  
649 with GST, or GST fused to full length EHD1 or EHD3, the Clathrin Heavy Chain terminal  
650 domain (CHC-TD) or the  $\gamma$ -adaptin ear domain, incubated with purified 6xHis-kazrin C.  
651 The membranes were probed with an  $\alpha$ -kazrin antibody (ab74114, from Abcam) and  
652 stained with Ponceau red to visualized the GST fusion constructs. **(D)** Immunoblots of pull-  
653 downs from glutathione-Sepharose beads coated with GST, or GST fused to the N- (amino  
654 acids 1-174) or C- (amino acids 161-327) terminal portions of kazrin C, incubated with  
655 non-denaturing extracts from MEFs. 10  $\mu$ g of total protein were loaded as input. Ponceau  
656 red staining of the same membrane (lower panels) is shown to visualize the protein extract  
657 or the GST fusion constructs. **(E)** Prediction of IDRs in kazrin C. The graph shows the  
658 probability of each residue of being part of an IDR, according to the IUPred2A software  
659 (Mészáros, Erdős and Dosztányi, 2018). Residues in the shaded area have a consistent  
660 probability over 0.5 to form part of an IDR. **(F)** Immunoblots of a lipid binding assay  
661 performed with either the purified GST-kazrin C C-terminal portion (amino acids 161-327)  
662 (GFP-kaz-Ct) or an equivalent construct in which the poly-K region has been mutated to

663 poly-A. The membranes used in this assay contain a concentration gradient of the indicated  
664 phosphoinositides. Membranes were probed with an  $\alpha$ -GST antibody.

665 **Figure 4. The kazrin C predicted IDR is required for its endocytic function. (A)**

666 Immunoblots of subcellular fractionations from kazKO cells expressing moderate amounts  
667 of GFP, GFP-kazrin C or a GFP-kazrin C construct lacking the C-terminal predicted IDR  
668 (GFP-kazrin-Nt). Cells were lysed in a non-denaturing buffer and centrifuged at 186000 g  
669 for 1 hour to separate membranes (Mic) from cytosol (Cyt). 15  $\mu$ g of the supernatant of the  
670 3000 g centrifugation (Tot), and 1 and 5 equivalents of the cytosolic and membrane

671 fractions were loaded per lane, respectively. **(B)** Maximum intensity Z-projections kazKO  
672 MEF expressing moderate amounts of GFP, GFP-kazrin C or a GFP-kazrin C construct  
673 lacking the C-terminal predicted IDR (GFP-kazrin-Nt), loaded with 20  $\mu$ g/ml of TxR-Tfn at  
674 16°C to accumulate endocytic cargo on EEs. The images from the GFP and TxR channels  
675 and the merge from 5 x 5  $\mu$ m<sup>2</sup> fields are shown on the right. **(C)** Mean  $\pm$  SEM of the

676 number of condensates per cell, visible with the GFP filter channel in the kazKO cells  
677 described in (B). p values of two-tailed Mann-Whitney test are shown. n = 29 for each  
678 sample. **(D)** Confocal micrographs of kazKO cells expressing low amounts of GFP, GFP-

679 kazrin C or a GFP-kazrin C construct lacking the C-terminal predicted IDR (GFP-kazrin-  
680 Nt) loaded with 20  $\mu$ g/ml of TxR-Tfn at 16°C and chased for 10 min at 37°C. Cell borders  
681 are indicated by dashed lines and the nuclei in blue. **(E)** Mean  $\pm$  SEM TxR-Tfn perinuclear

682 enrichment for the cells and experimental conditions described in D. The mean  
683 fluorescence intensity within a circle of 10  $\mu$ m in the perinuclear region was quantified and  
684 divided by the mean signal in the cell. The data is normalized to the mean value of kazKO  
685 cells expressing GFP. p values of two-tailed Mann-Whitney test are shown. n > 25 for each  
686 sample.

687 **Figure 5. Kazrin C concentrates in the pericentriolar region and directly interacts with**  
688 **the dynactin complex and the dynein Light Intermediate Chain 1 (LIC1) (A)** Merged  
689 confocal fluorescence micrographs of kazKO MEF moderately expressing GFP-kazrin C,  
690 fixed and stained with  $\alpha$ -EEA1 and A568-conjugated secondary antibodies. Individual  
691 channels and merged confocal images of 6x magnifications are shown. Scale bar, 10  $\mu$ m.  
692 **(B)** Merged and individual channels of confocal fluorescence micrographs of kazKO MEF  
693 moderately expressing GFP or GFP-kazrin C, fixed and stained with  $\alpha$ -pericentrin and  
694 A568-conjugated secondary antibodies. 3.5x magnifications are shown. Arrowheads  
695 indicate cell-cell borders. Scale bar, 10  $\mu$ m. **(C)** Confocal fluorescence micrographs of  
696 kazKO MEF moderately expressing GFP-kazrin C, treated with DMSO or 100 ng/ml  
697 nocodazole for 16 hours, fixed, and stained with  $\alpha$ -EEA1 and A568-conjugated secondary  
698 antibodies and DAPI. Scale bar, 5  $\mu$ m. **(D)** Percentage of cells with a perinuclear  
699 localization pattern of GFP-kazrin C (left) and mean  $\pm$  SEM EEA1 perinuclear enrichment  
700 (right) in cells treated as described in C.  $n > 32$  for each sample. The EEA1 perinuclear  
701 enrichment was quantified as the mean fluorescence intensity signal within a circle of 10  
702  $\mu$ m in the perinuclear region divided by the mean cell signal. The data was normalized to  
703 the mean of the cells mock treated. The p values of a two-sided Fisher's exact test (left) and  
704 a two-tailed Student t test (right) are shown.  $n > 32$  for each sample. **(E)** Sequence  
705 comparison between kazrin C and human BICDR1 calculated with LALIGN. **(F)**  
706 Immunoblots of  $\alpha$ -GFP agarose immunoprecipitates (IP) from cell lysates of kazKO MEF  
707 moderately expressing GFP or GFP-kazrin C, probed with  $\alpha$ -p150 glued (dynactin),  $\alpha$ -  
708 kinesin-1,  $\alpha$ -tubulin or  $\alpha$ -GFP antibodies. **(G)** Immunoblots of pull-downs with purified  
709 GST or GST fused to the full length kazrin C (GST-kazrin) or its N-terminal (amino acids  
710 1-176) (GST-kazrin-Nt) or C-terminal (amino acids 161-327) (GST-kazrin-Ct) portions,



711 incubated with (+) or without (-) the dynactin complex purified from pig. The membranes  
712 were probed with a  $\alpha$ -p150 glued antibody or stained with Ponceau red to detect the GST  
713 constructs. **(H)** Immunoblots of pull-downs with glutathione-Sepharose beads coated with  
714 GST, GST-LIC1 or GST-LIC2 incubated with purified 6xHis-kazrin C. The membranes  
715 were probed with a mouse  $\alpha$ -kazrin antibody or stained with Ponceau red to detect the GST  
716 constructs. **(I)** Immunoblot of protein A-Sepharose immunoprecipitates (IP) from WT or  
717 kazKO MEFs using a mix of rabbit polyclonal serums against the N- and C-terminal  
718 domains of kazrin C or a pre-immunisation serum, probed with a  $\alpha$ -p150 glued (dynactin)  
719 antibody. The low amounts of endogenous kazrin could not be detected in the  
720 immunoprecipitates with any of the antibodies tested because the antibody had a molecular  
721 weight similar to endogenous kazrin (about 50 Kda) and interfered with the detection. The  
722 kazKO MEF were used as a specificity control instead.

723 **Figure 6. Depletion of kazrin impairs endosome motility.** **(A)** Kymographs of maximum  
724 intensity Z projections of confocal fluorescence microscopy movies taken for 90 seconds  
725 with a 3 second time lapse, of WT and kazKO MEF or kazKO MEF expressing low levels  
726 of GFP, GFP-kazrin C or a GFP-kazrin C construct lacking the C-terminal predicted IDR  
727 (GFP-kazrin-Nt), showing trajectories of EE loaded with 20  $\mu$ g/ml of TxR-Tfn at 16°C.  
728 Cells were shifted to 37°C and immediately imaged. A magnified 10 x 10  $\mu$ m<sup>2</sup> inset is  
729 shown below. Arrows point to straight trajectories and dashed circles indicate constrained  
730 endosome movements. **(B)** Mean  $\pm$  SEM (left graphs) of the length of straight endosome  
731 trajectories (longer than 1 $\mu$ m) for the cells and experimental conditions described in (A). p  
732 values of two-tailed Mann-Whitney tests are shown. n = 100 for each sample. Frequencies  
733 of the trajectory length in each cell type are shown on the right. **(C)**. Mean  $\pm$  SEM (left  
734 graphs) of the maximum instantaneous velocities ( $V_i$ ) of centripetal endosome trajectories

735 (longer than 1 $\mu$ m) for the cells and experimental conditions described in (A). p values of  
736 two-tailed Mann-Whitney tests are shown. n = 100 for each sample. Frequencies of the  
737 maximum Vi for each cell type are shown on the right.

### 738 **Bibliography**

739 Baron, A.T., and Salisbury, J.L. (1988). Identification and localization of a novel,  
740 cytoskeletal, centrosome-associated protein in PtK2 cells. *J Cell Biol* 107, 2669-2678.

741 Cadwell, C.M., Su, W., and Kowalczyk, A.P. (2016). Cadherin tales: Regulation of  
742 cadherin function by endocytic membrane trafficking. *Traffic* 17, 1262-1271.

743 Cho, K., Lee, M., Gu, D., Munoz, W.A., Ji, H., Kloc, M., and McCrea, P.D. (2011). Kazrin,  
744 and its binding partners ARVCF- and delta-catenin, are required for *Xenopus laevis*  
745 craniofacial development. *Developmental dynamics* : an official publication of the  
746 American Association of Anatomists 240, 2601-2612.

747 Cho, K., Vaught, T.G., Ji, H., Gu, D., Papasakelariou-Yared, C., Horstmann, N., Jennings,  
748 J.M., Lee, M., Sevilla, L.M., Kloc, M., *et al.* (2010). *Xenopus* Kazrin interacts with  
749 ARVCF-catenin, spectrin and p190B RhoGAP, and modulates RhoA activity and epithelial  
750 integrity. *J Cell Sci* 123, 4128-4144.

751 Christensen, J.R., Kendrick, A.A., Truong, J.B., Aguilar-Maldonado, A., Adani, V.,  
752 Dzieciatkowska, M., and Reck-Peterson, S.L. (2021). Cytoplasmic dynein-1 cargo diversity  
753 is mediated by the combinatorial assembly of FTS-Hook-FHIP complexes. *eLife* 10.

754 Dang, I., Gorelik, R., Sousa-Blin, C., Derivery, E., Guerin, C., Linkner, J., Nemethova, M.,  
755 Dumortier, J.G., Giger, F.A., Chipysheva, T.A., *et al.* (2013). Inhibitory signalling to the  
756 Arp2/3 complex steers cell migration. *Nature* 503, 281-284.

757 Driskell, O.J., Mironov, A., Allan, V.J., and Woodman, P.G. (2007). Dynein is required for  
758 receptor sorting and the morphogenesis of early endosomes. *Nat Cell Biol* 9, 113-120.

759 Flores-Rodriguez, N., Rogers, S.S., Kenwright, D.A., Waigh, T.A., Woodman, P.G., and  
760 Allan, V.J. (2011). Roles of dynein and dynactin in early endosome dynamics revealed  
761 using automated tracking and global analysis. *PLoS One* *6*, e24479.

762 Geli, M.I., Lombardi, R., Schmelzl, B., and Riezman, H. (2000). An intact SH3 domain is  
763 required for myosin I-induced actin polymerization. *Embo J* *19*, 4281-4291.

764 Granger, E., McNee, G., Allan, V., and Woodman, P. (2014). The role of the cytoskeleton  
765 and molecular motors in endosomal dynamics. *Seminars in cell & developmental biology*  
766 *31*, 20-29.

767 Grant, B.D., and Caplan, S. (2008). Mechanisms of EHD/RME-1 protein function in  
768 endocytic transport. *Traffic* *9*, 2043-2052.

769 Green, K.J., Roth-Carter, Q., Niessen, C.M., and Nichols, S.A. (2020). Tracing the  
770 Evolutionary Origin of Desmosomes. *Curr Biol* *30*, R535-R543.

771 Groot, K.R., Sevilla, L.M., Nishi, K., DiColandrea, T., and Watt, F.M. (2004). Kazrin, a  
772 novel periplakin-interacting protein associated with desmosomes and the keratinocyte  
773 plasma membrane. *J Cell Biol* *166*, 653-659.

774 Gul, I.S., Hulpiau, P., Saeys, Y., and van Roy, F. (2017). Evolution and diversity of  
775 cadherins and catenins. *Exp Cell Res* *358*, 3-9.

776 Guo, X., Farias, G.G., Mattera, R., and Bonifacino, J.S. (2016). Rab5 and its effector FHF  
777 contribute to neuronal polarity through dynein-dependent retrieval of somatodendritic  
778 proteins from the axon. *Proc Natl Acad Sci U S A* *113*, E5318-5327.

779 Haberg, K., Lundmark, R., and Carlsson, S.R. (2008). SNX18 is an SNX9 paralog that acts  
780 as a membrane tubulator in AP-1-positive endosomal trafficking. *J Cell Sci* *121*, 1495-  
781 1505.

- 782 Hsu, V.W., Bai, M., and Li, J. (2012). Getting active: protein sorting in endocytic  
783 recycling. *Nat Rev Mol Cell Biol* *13*, 323-328.
- 784 Hunt, S.D., Townley, A.K., Danson, C.M., Cullen, P.J., and Stephens, D.J. (2013).  
785 Microtubule motors mediate endosomal sorting by maintaining functional domain  
786 organization. *J Cell Sci* *126*, 2493-2501.
- 787 Jha, R., Roostalu, J., Cade, N.I., Trokter, M., and Surrey, T. (2017). Combinatorial  
788 regulation of the balance between dynein microtubule end accumulation and initiation of  
789 directed motility. *EMBO J* *36*, 3387-3404.
- 790 Jones, M.C., Caswell, P.T., and Norman, J.C. (2006). Endocytic recycling pathways:  
791 emerging regulators of cell migration. *Curr Opin Cell Biol* *18*, 549-557.
- 792 Kaszak, I., Witkowska-Pilaszewicz, O., Niewiadomska, Z., Dworecka-Kaszak, B., Ngosa  
793 Toka, F., and Jurka, P. (2020). Role of Cadherins in Cancer-A Review. *International*  
794 *journal of molecular sciences* *21*.
- 795 Kawauchi, T. (2012). Cell adhesion and its endocytic regulation in cell migration during  
796 neural development and cancer metastasis. *International journal of molecular sciences* *13*,  
797 4564-4590.
- 798 Kendrick, A.A., Dickey, A.M., Redwine, W.B., Tran, P.T., Vaites, L.P., Dzieciatkowska,  
799 M., Harper, J.W., and Reck-Peterson, S.L. (2019). Hook3 is a scaffold for the opposite-  
800 polarity microtubule-based motors cytoplasmic dynein-1 and KIF1C. *J Cell Biol* *218*, 2982-  
801 3001.
- 802 Kikuno, R., Nagase, T., Ishikawa, K., Hirose, M., Miyajima, N., Tanaka, A., Kotani, H.,  
803 Nomura, N., and Ohara, O. (1999). Prediction of the coding sequences of unidentified  
804 human genes. XIV. The complete sequences of 100 new cDNA clones from brain which

805 code for large proteins in vitro. *DNA research : an international journal for rapid*  
806 *publication of reports on genes and genomes* 6, 197-205.

807 Laemmli, U.K. (1970). Cleavage of structural proteins during the assembly of the head of  
808 bacteriophage T4. *Nature* 227, 680-685.

809 Lee, I.G., Cason, S.E., Alqassim, S.S., Holzbaur, E.L.F., and Dominguez, R. (2020). A  
810 tunable LIC1-adaptor interaction modulates dynein activity in a cargo-specific manner. *Nat*  
811 *Commun* 11, 5695.

812 Li, X., and Donowitz, M. (2014). Fractionation of subcellular membrane vesicles of  
813 epithelial and non-epithelial cells by OptiPrep density gradient ultracentrifugation. *Methods*  
814 *Mol Biol* 1174, 85-99.

815 Loubery, S., Wilhelm, C., Hurbain, I., Neveu, S., Louvard, D., and Coudrier, E. (2008).  
816 Different microtubule motors move early and late endocytic compartments. *Traffic* 9, 492-  
817 509.

818 Maldonado-Baez, L., and Donaldson, J.G. (2013). Hook1, microtubules, and Rab22:  
819 mediators of selective sorting of clathrin-independent endocytic cargo proteins on  
820 endosomes. *Bioarchitecture* 3, 141-146.

821 McNally, K.E., and Cullen, P.J. (2018). Endosomal Retrieval of Cargo: Retromer Is Not  
822 Alone. *Trends Cell Biol* 28, 807-822.

823 Mellman, I. (1996). Endocytosis and molecular sorting. *Annu Rev Cell Dev Biol* 12, 575-  
824 625.

825 Nachat, R., Cipolat, S., Sevilla, L.M., Chhatriwala, M., Groot, K.R., and Watt, F.M. (2009).  
826 KazrinE is a desmosome-associated liprin that colocalises with acetylated microtubules. *J*  
827 *Cell Sci* 122, 4035-4041.

- 828 Naslavsky, N., and Caplan, S. (2018). The enigmatic endosome - sorting the ins and outs of  
829 endocytic trafficking. *J Cell Sci* *131*.
- 830 Naslavsky, N., Rahajeng, J., Sharma, M., Jovic, M., and Caplan, S. (2006). Interactions  
831 between EHD proteins and Rab11-FIP2: a role for EHD3 in early endosomal transport. *Mol*  
832 *Biol Cell* *17*, 163-177.
- 833 Nielsen, E., Severin, F., Backer, J.M., Hyman, A.A., and Zerial, M. (1999). Rab5 regulates  
834 motility of early endosomes on microtubules. *Nat Cell Biol* *1*, 376-382.
- 835 Olenick, M.A., Dominguez, R., and Holzbaaur, E.L.F. (2019). Dynein activator Hook1 is  
836 required for trafficking of BDNF-signaling endosomes in neurons. *J Cell Biol* *218*, 220-  
837 233.
- 838 Olenick, M.A., and Holzbaaur, E.L.F. (2019). Dynein activators and adaptors at a glance. *J*  
839 *Cell Sci* *132*.
- 840 Perrin, L., Lacas-Gervais, S., Gilleron, J., Ceppo, F., Prodon, F., Benmerah, A., Tanti, J.F.,  
841 and Cormont, M. (2013). Rab4b controls an early endosome sorting event by interacting  
842 with the gamma-subunit of the clathrin adaptor complex 1. *J Cell Sci* *126*, 4950-4962.
- 843 Pollard, T.D., and O'Shaughnessy, B. (2019). Molecular Mechanism of Cytokinesis. *Annu*  
844 *Rev Biochem* *88*, 661-689.
- 845 Prosser, S.L., and Pelletier, L. (2020). Centriolar satellite biogenesis and function in  
846 vertebrate cells. *J Cell Sci* *133*.
- 847 Sambrook, J., Fritsch, E.F., and Maniatis, T. (1989). *Molecular Cloning: a Laboratory*  
848 *Manual*, 2nd ed. . Cold Spring Harbor Laboratory Press.
- 849 Schindelin, J., Arganda-Carreras, I., Frise, E., Kaynig, V., Longair, M., Pietzsch, T.,  
850 Preibisch, S., Rueden, C., Saalfeld, S., Schmid, B., *et al.* (2012). Fiji: an open-source  
851 platform for biological-image analysis. *Nat Methods* *9*, 676-682.

852 Schmelzl, B., and Geli, M.I. (2002). An efficient genetic screen in mammalian cultured  
853 cells. *EMBO reports* 3, 682-687.

854 Sevilla, L.M., Nachat, R., Groot, K.R., and Watt, F.M. (2008a). Kazrin regulates  
855 keratinocyte cytoskeletal networks, intercellular junctions and differentiation. *J Cell Sci*  
856 *121*, 3561-3569.

857 Sevilla, L.M., Rana, A.A., Watt, F.M., and Smith, J.C. (2008b). KazrinA is required for  
858 axial elongation and epidermal integrity in *Xenopus tropicalis*. *Developmental dynamics* :  
859 an official publication of the American Association of Anatomists *237*, 1718-1725.

860 Sheff, D., Pelletier, L., O'Connell, C.B., Warren, G., and Mellman, I. (2002). Transferrin  
861 receptor recycling in the absence of perinuclear recycling endosomes. *J Cell Biol* *156*, 797-  
862 804.

863 Solinger, J.A., Rashid, H.O., Prescianotto-Baschong, C., and Spang, A. (2020). FERARI is  
864 required for Rab11-dependent endocytic recycling. *Nat Cell Biol* *22*, 213-224.

865 Szebenyi, G., Hall, B., Yu, R., Hashim, A.I., and Kramer, H. (2007). Hook2 localizes to the  
866 centrosome, binds directly to centriolin/CEP110 and contributes to centrosomal function.  
867 *Traffic* *8*, 32-46.

868 Wang, H., Lo, W.T., and Haucke, V. (2019). Phosphoinositide switches in endocytosis and  
869 in the endolysosomal system. *Curr Opin Cell Biol* *59*, 50-57.

870 Wang, Q., Liu, M., Li, X., Chen, L., and Tang, H. (2009). Kazrin F is involved in apoptosis  
871 and interacts with BAX and ARC. *Acta Biochim Biophys Sin (Shanghai)* *41*, 763-772.

872 White, D.P., Caswell, P.T., and Norman, J.C. (2007).  $\alpha$ v $\beta$ 3 and  $\alpha$ 5 $\beta$ 1  
873 integrin recycling pathways dictate downstream Rho kinase signaling to regulate persistent  
874 cell migration. *J Cell Biol* *177*, 515-525.

875 Wilson, B.J., Allen, J.L., and Caswell, P.T. (2018). Vesicle trafficking pathways that direct  
876 cell migration in 3D matrices and in vivo. *Traffic* 19, 899-909.

877 Wilson, G.M., Fielding, A.B., Simon, G.C., Yu, X., Andrews, P.D., Hames, R.S., Frey,  
878 A.M., Peden, A.A., Gould, G.W., and Prekeris, R. (2005). The FIP3-Rab11 protein  
879 complex regulates recycling endosome targeting to the cleavage furrow during late  
880 cytokinesis. *Mol Biol Cell* 16, 849-860.

881 Xiang, X., and Qiu, R. (2020). Cargo-Mediated Activation of Cytoplasmic Dynein in vivo.  
882 *Frontiers in cell and developmental biology* 8, 598952.

883 Xiang, X., Qiu, R., Yao, X., Arst, H.N., Jr., Penalva, M.A., and Zhang, J. (2015).  
884 Cytoplasmic dynein and early endosome transport. *Cell Mol Life Sci* 72, 3267-3280.

885 Xu, L., Sowa, M.E., Chen, J., Li, X., Gygi, S.P., and Harper, J.W. (2008). An  
886 FTS/Hook/p107(FHIP) complex interacts with and promotes endosomal clustering by the  
887 homotypic vacuolar protein sorting complex. *Mol Biol Cell* 19, 5059-5071.

888 Yuan, L., and Arikath, J. (2017). Functional roles of p120ctn family of proteins in central  
889 neurons. *Seminars in cell & developmental biology* 69, 70-82.

890



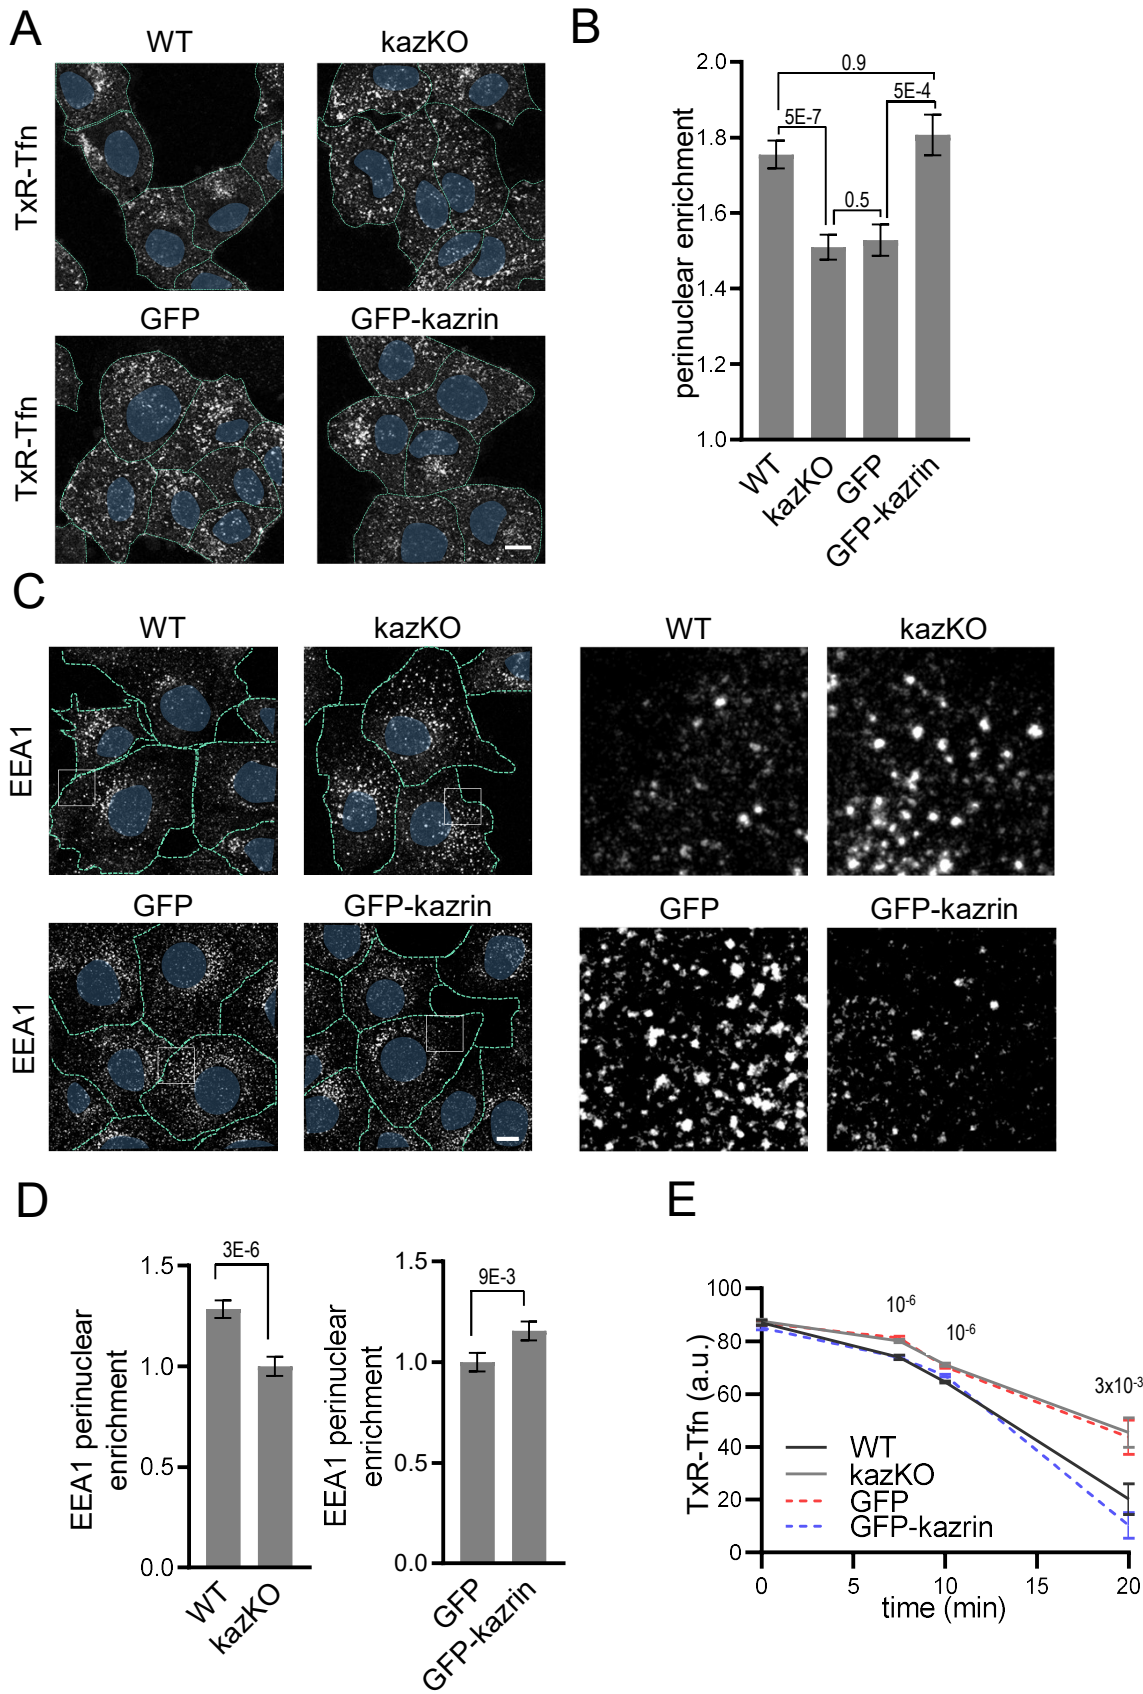

Fig. 1

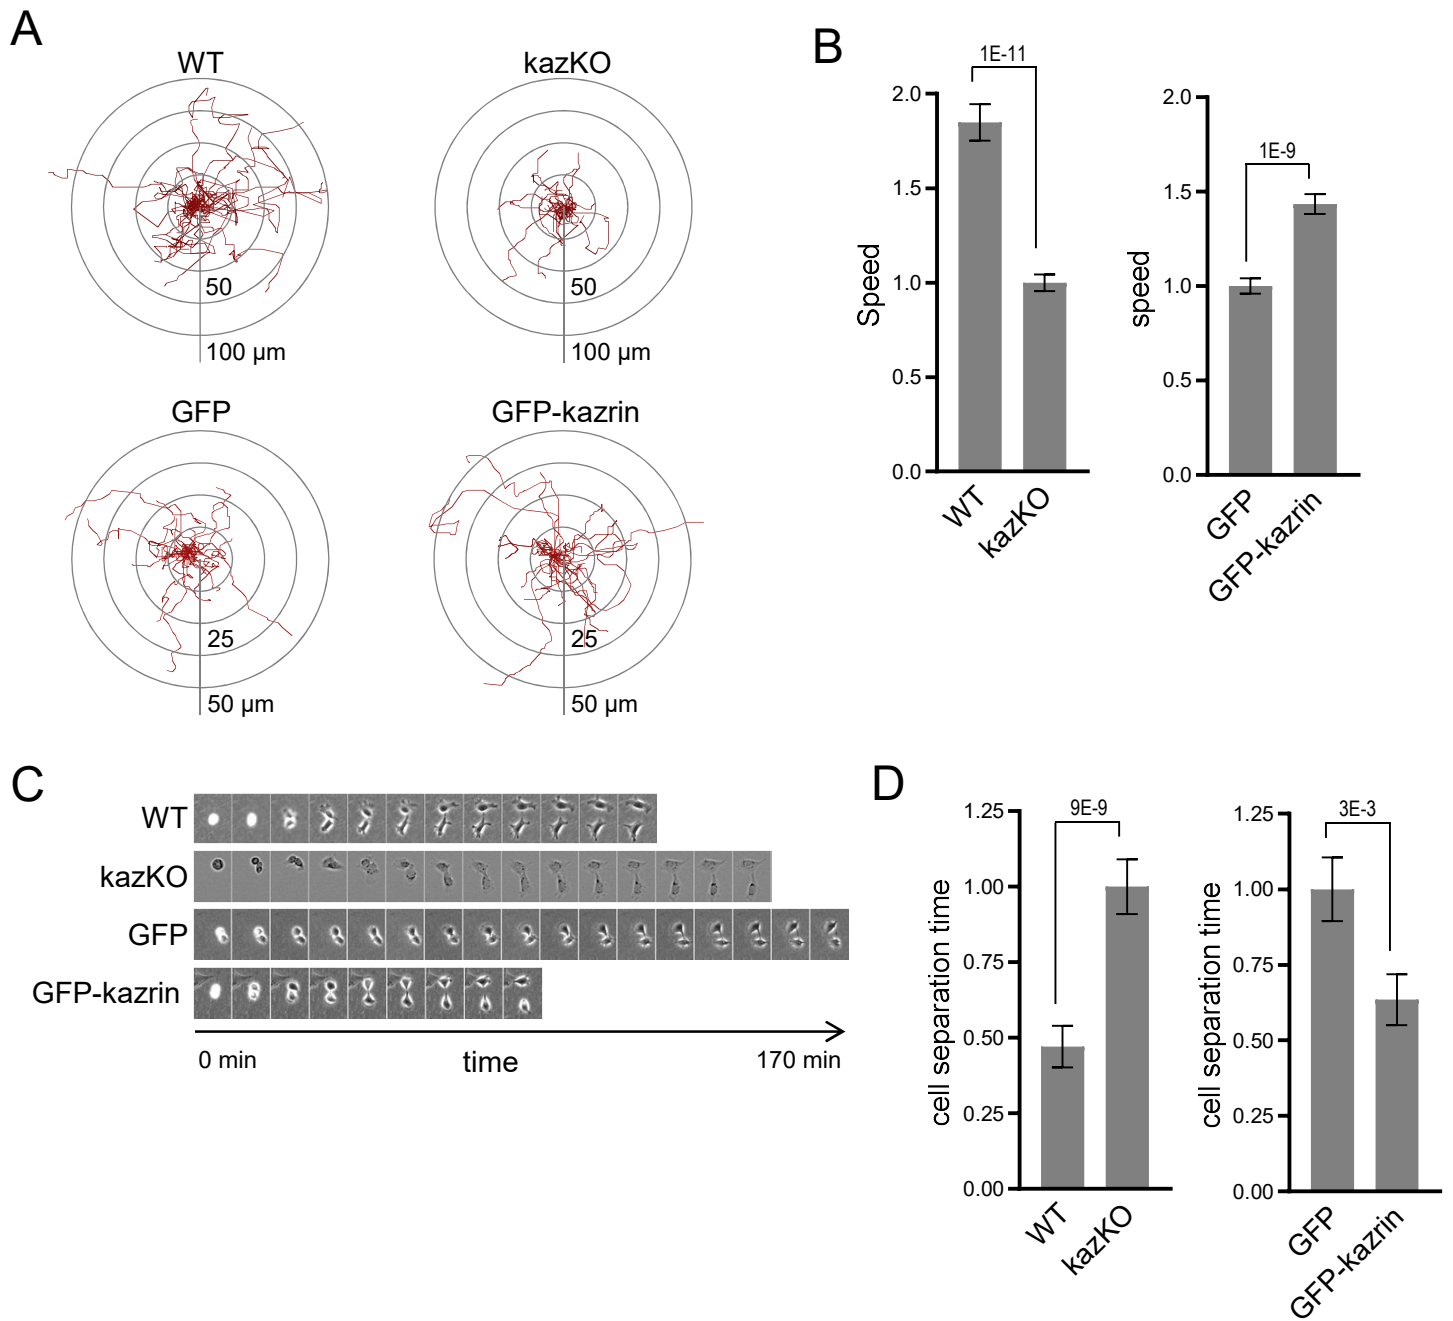

Fig. 2

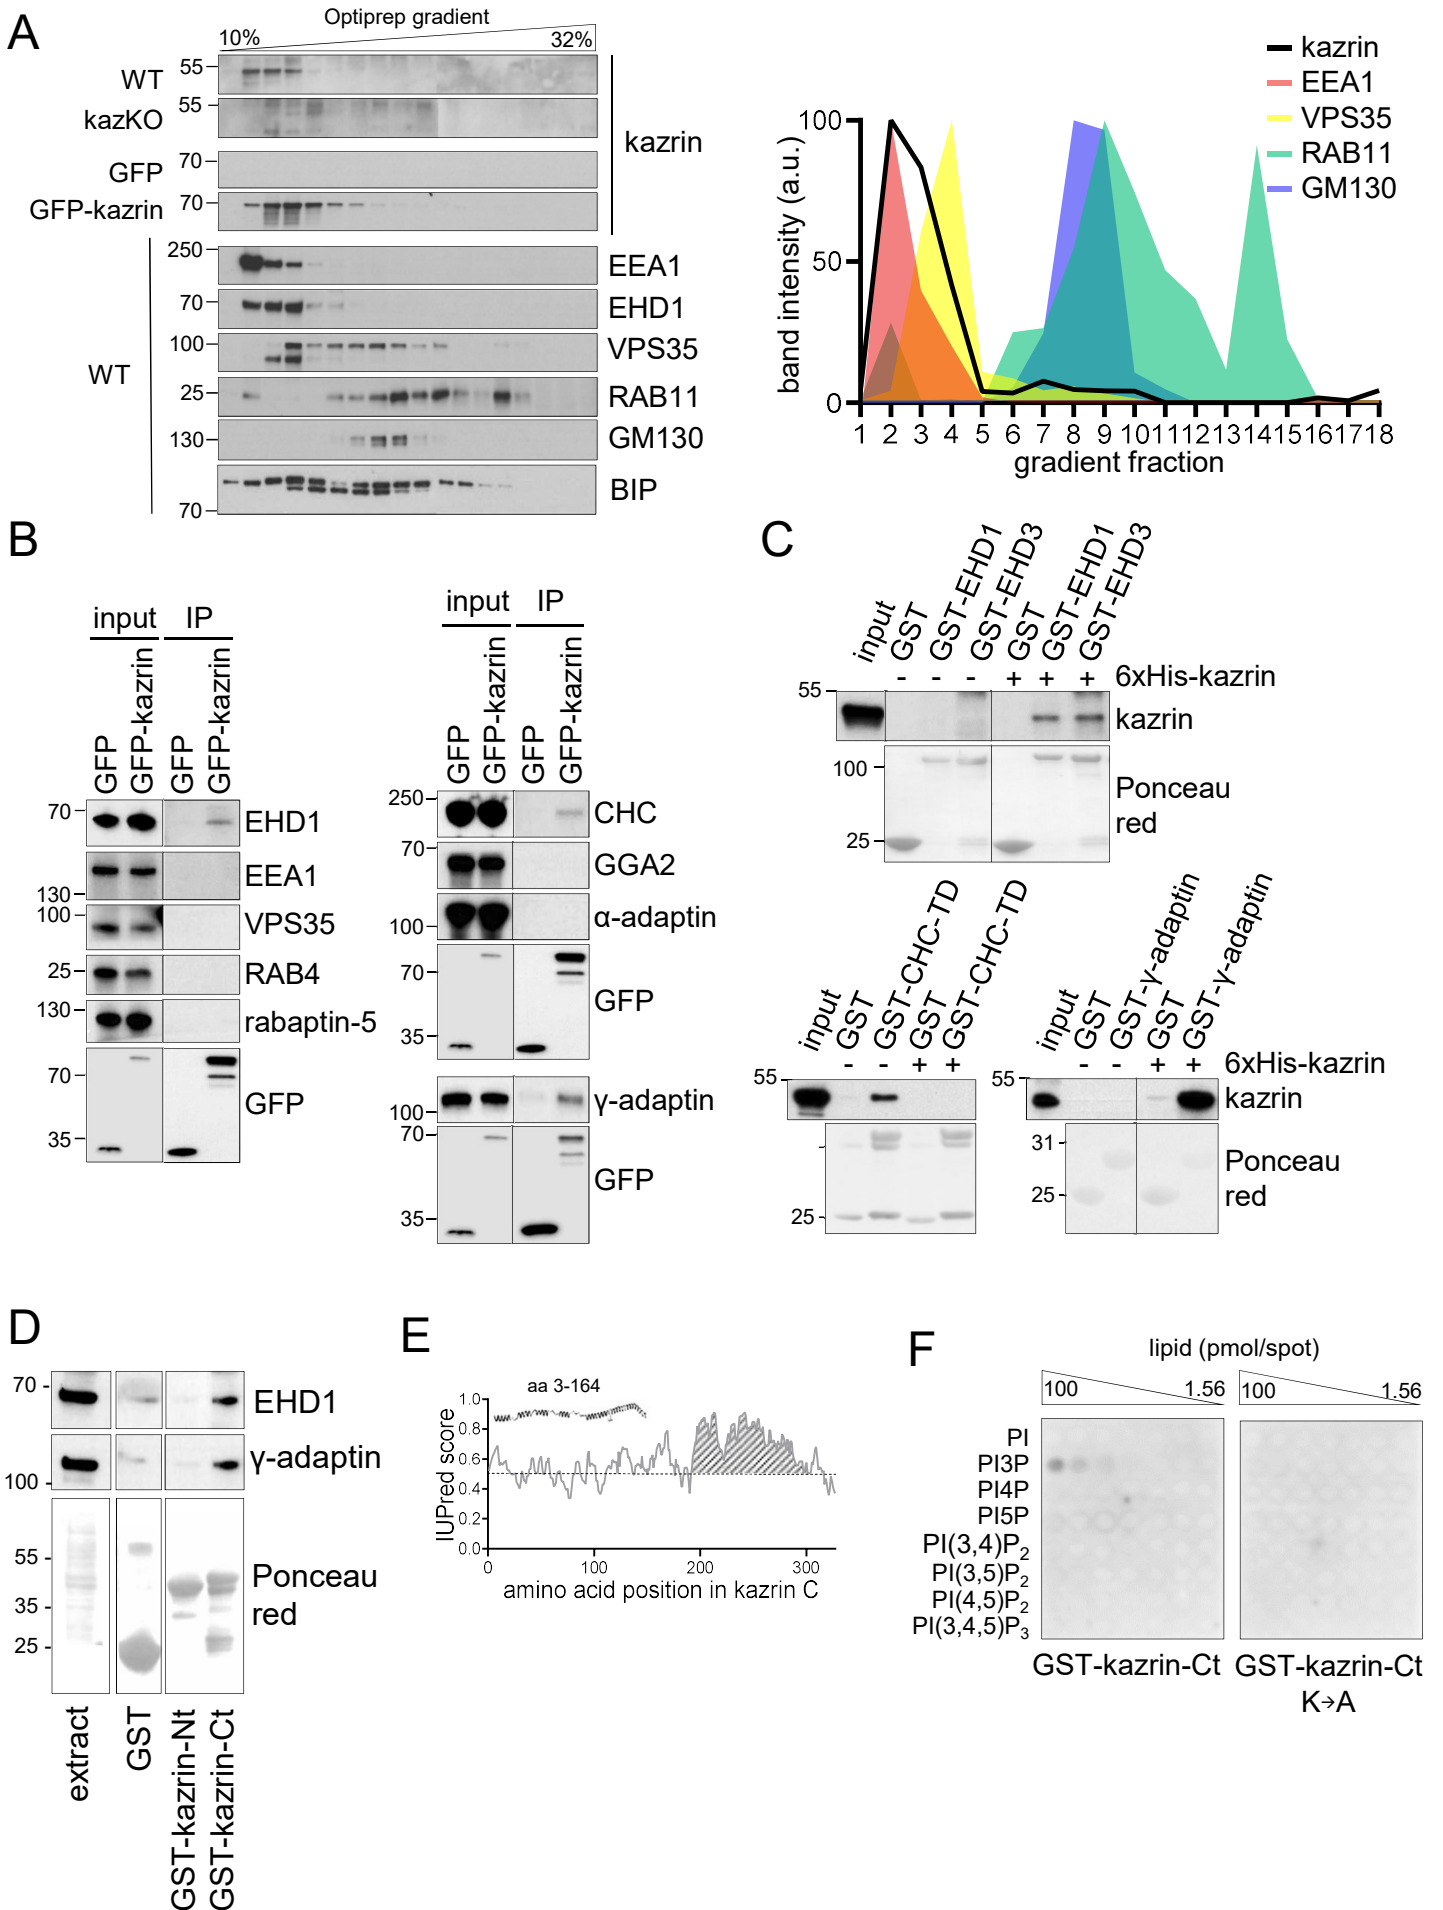

Fig. 3

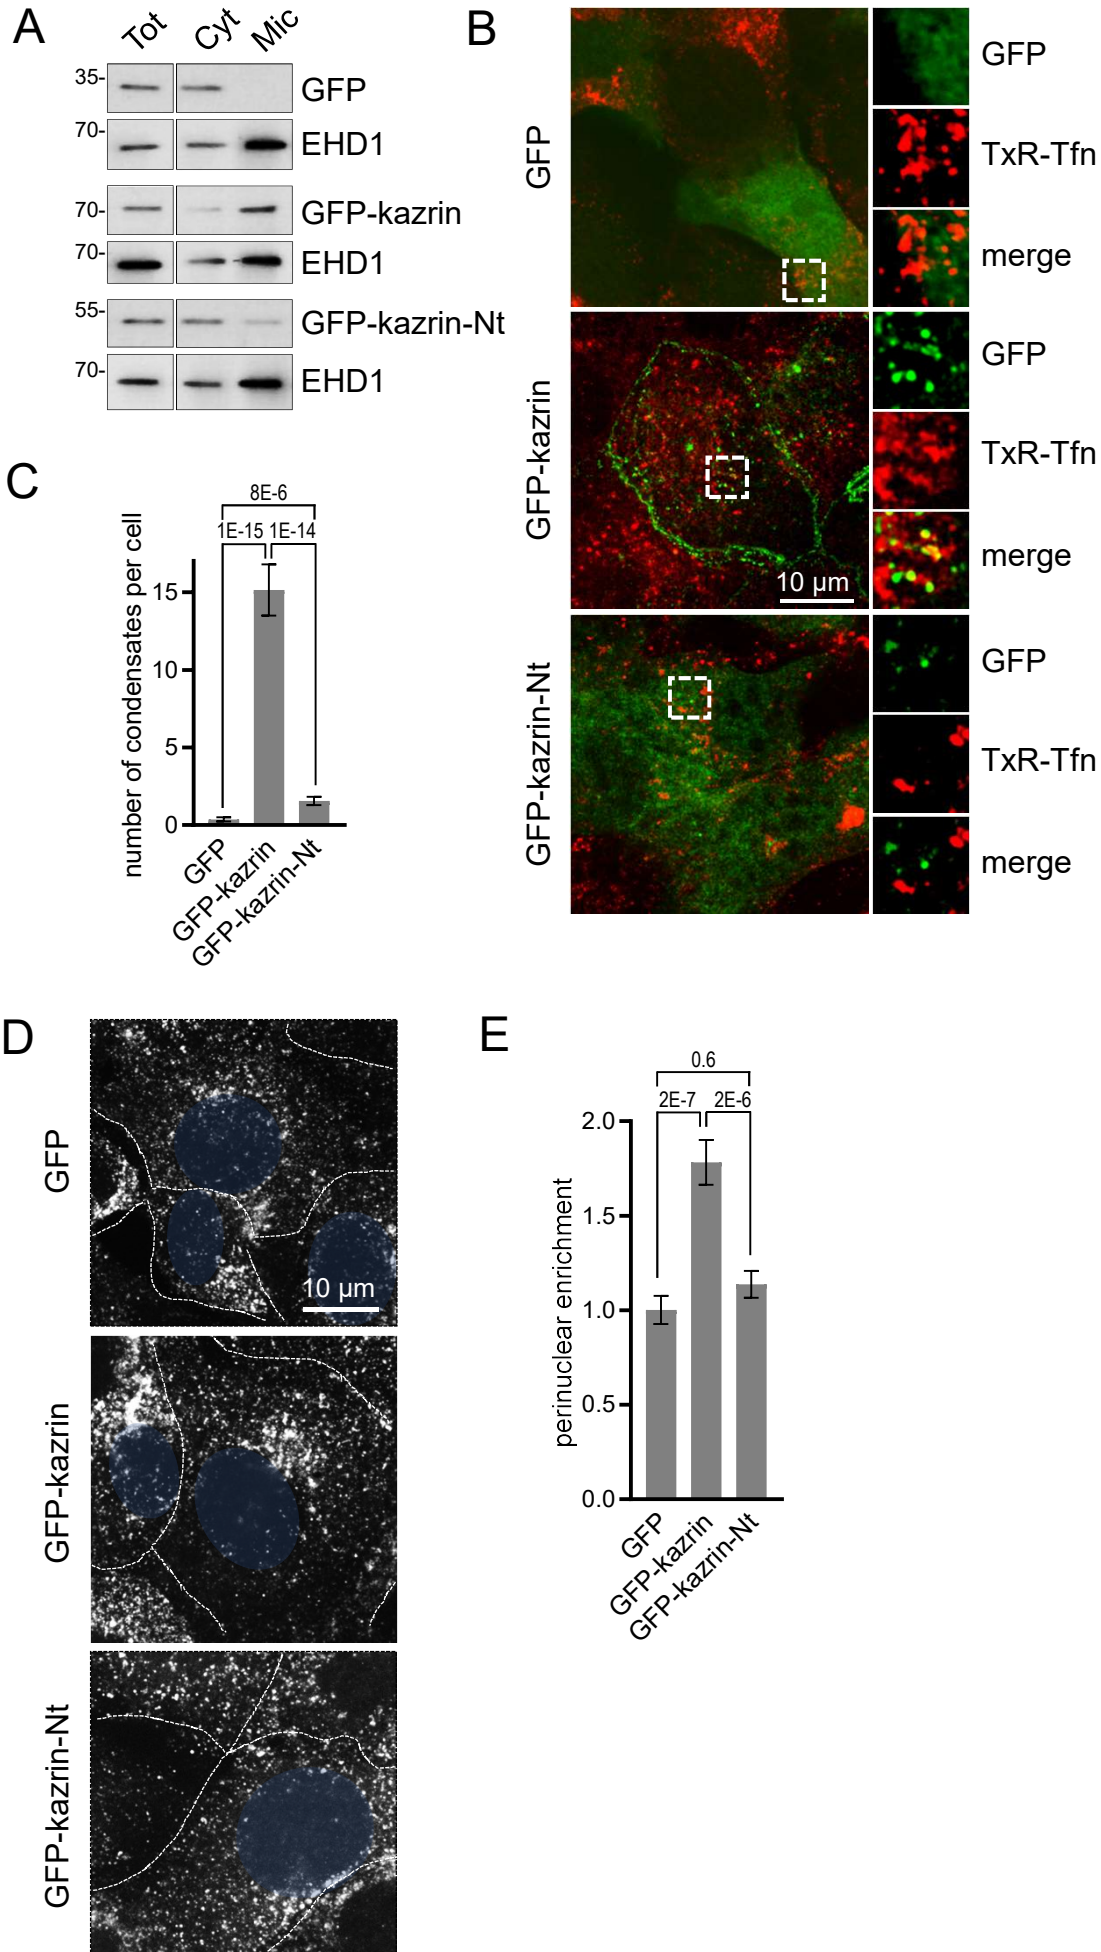

Fig. 4

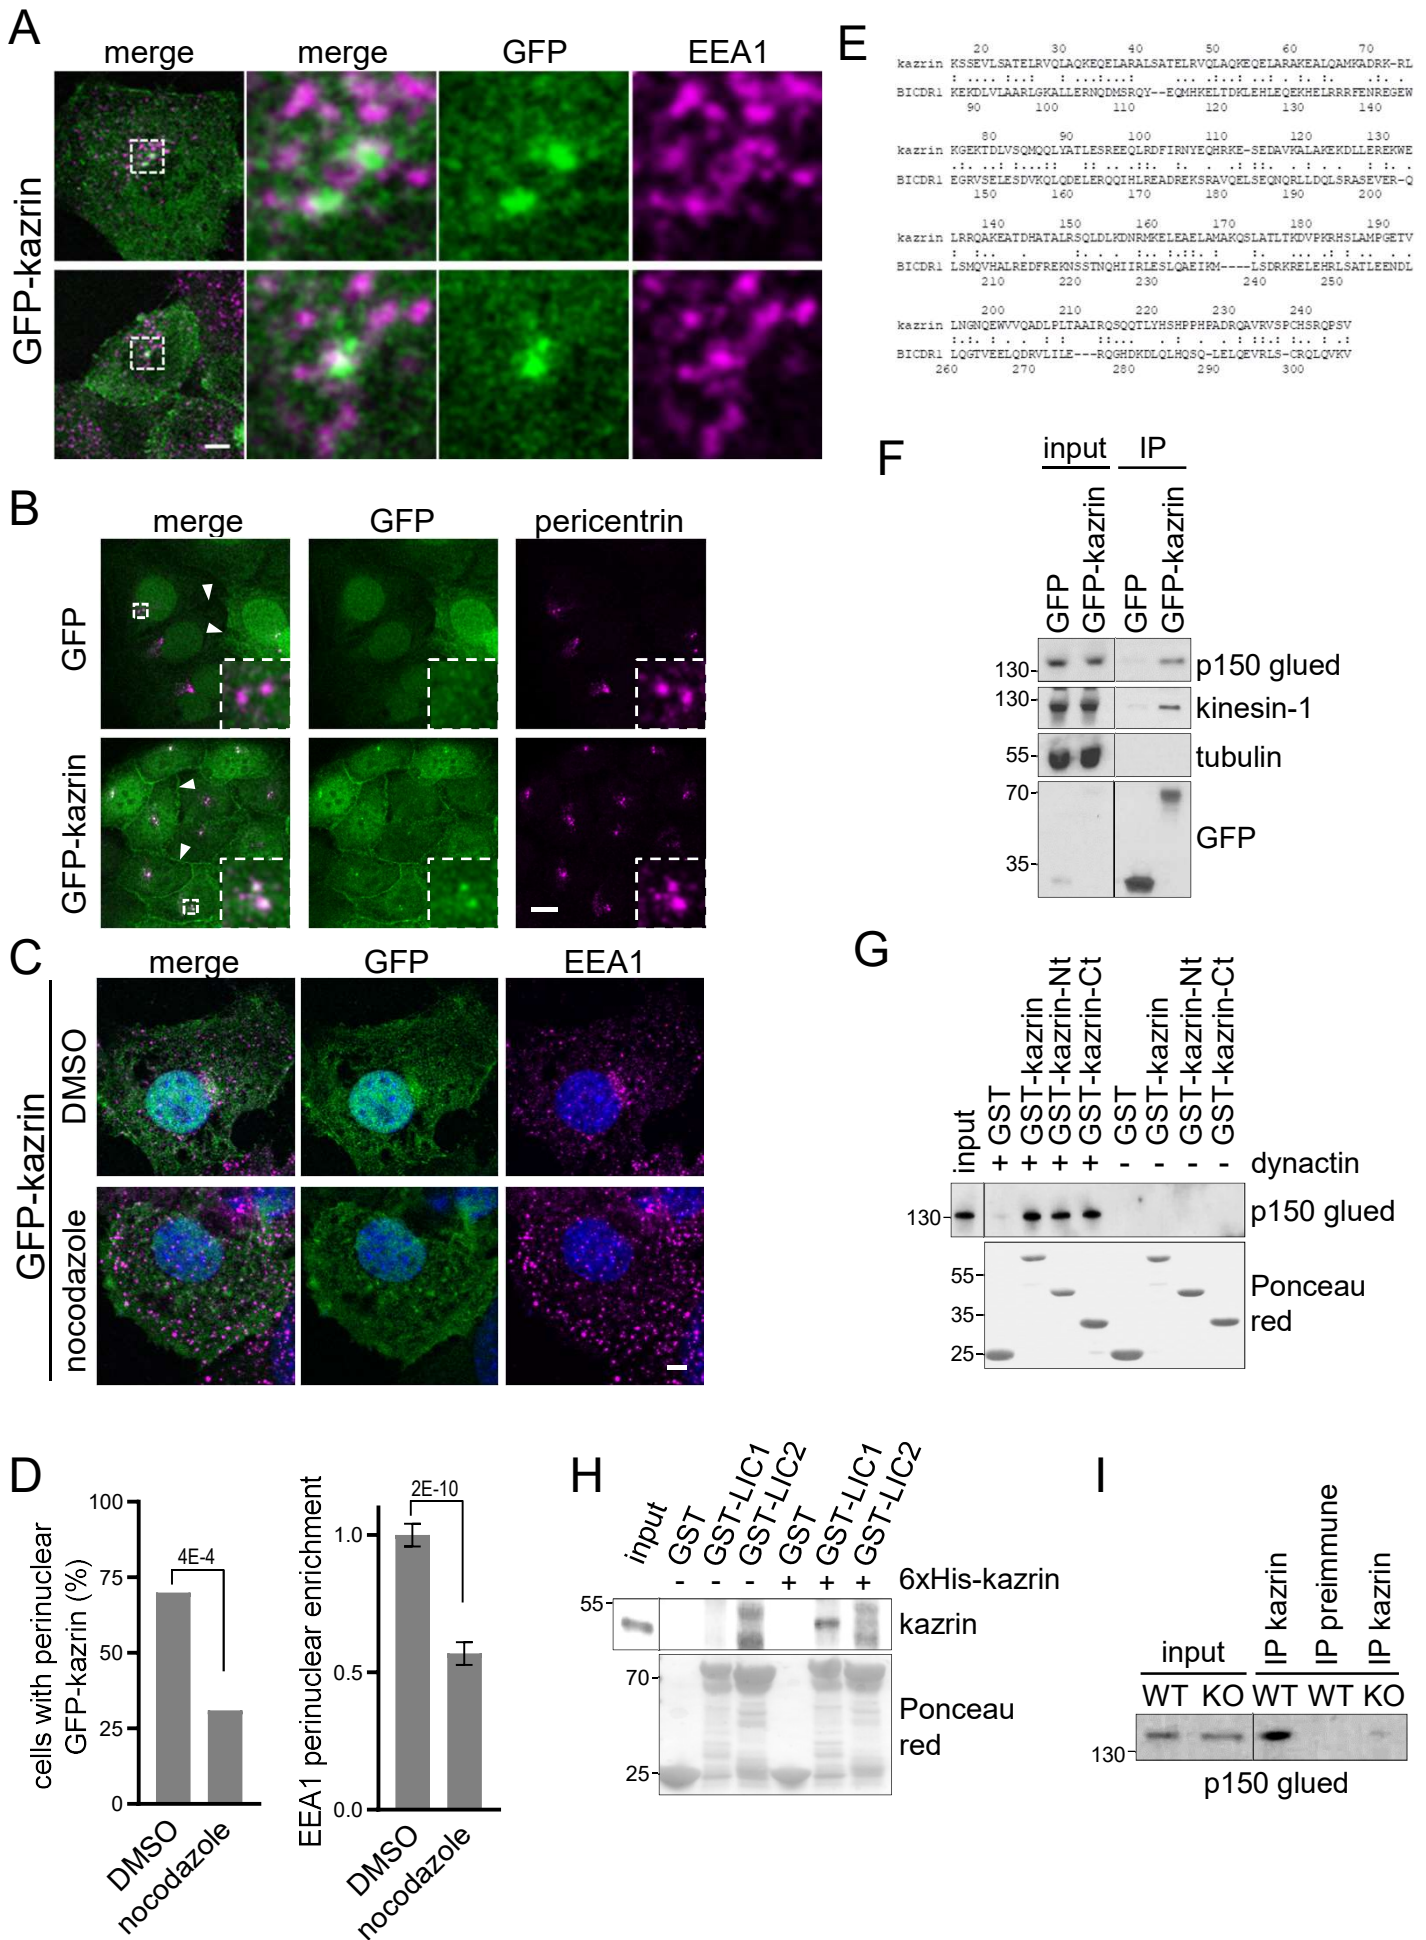

Fig. 5

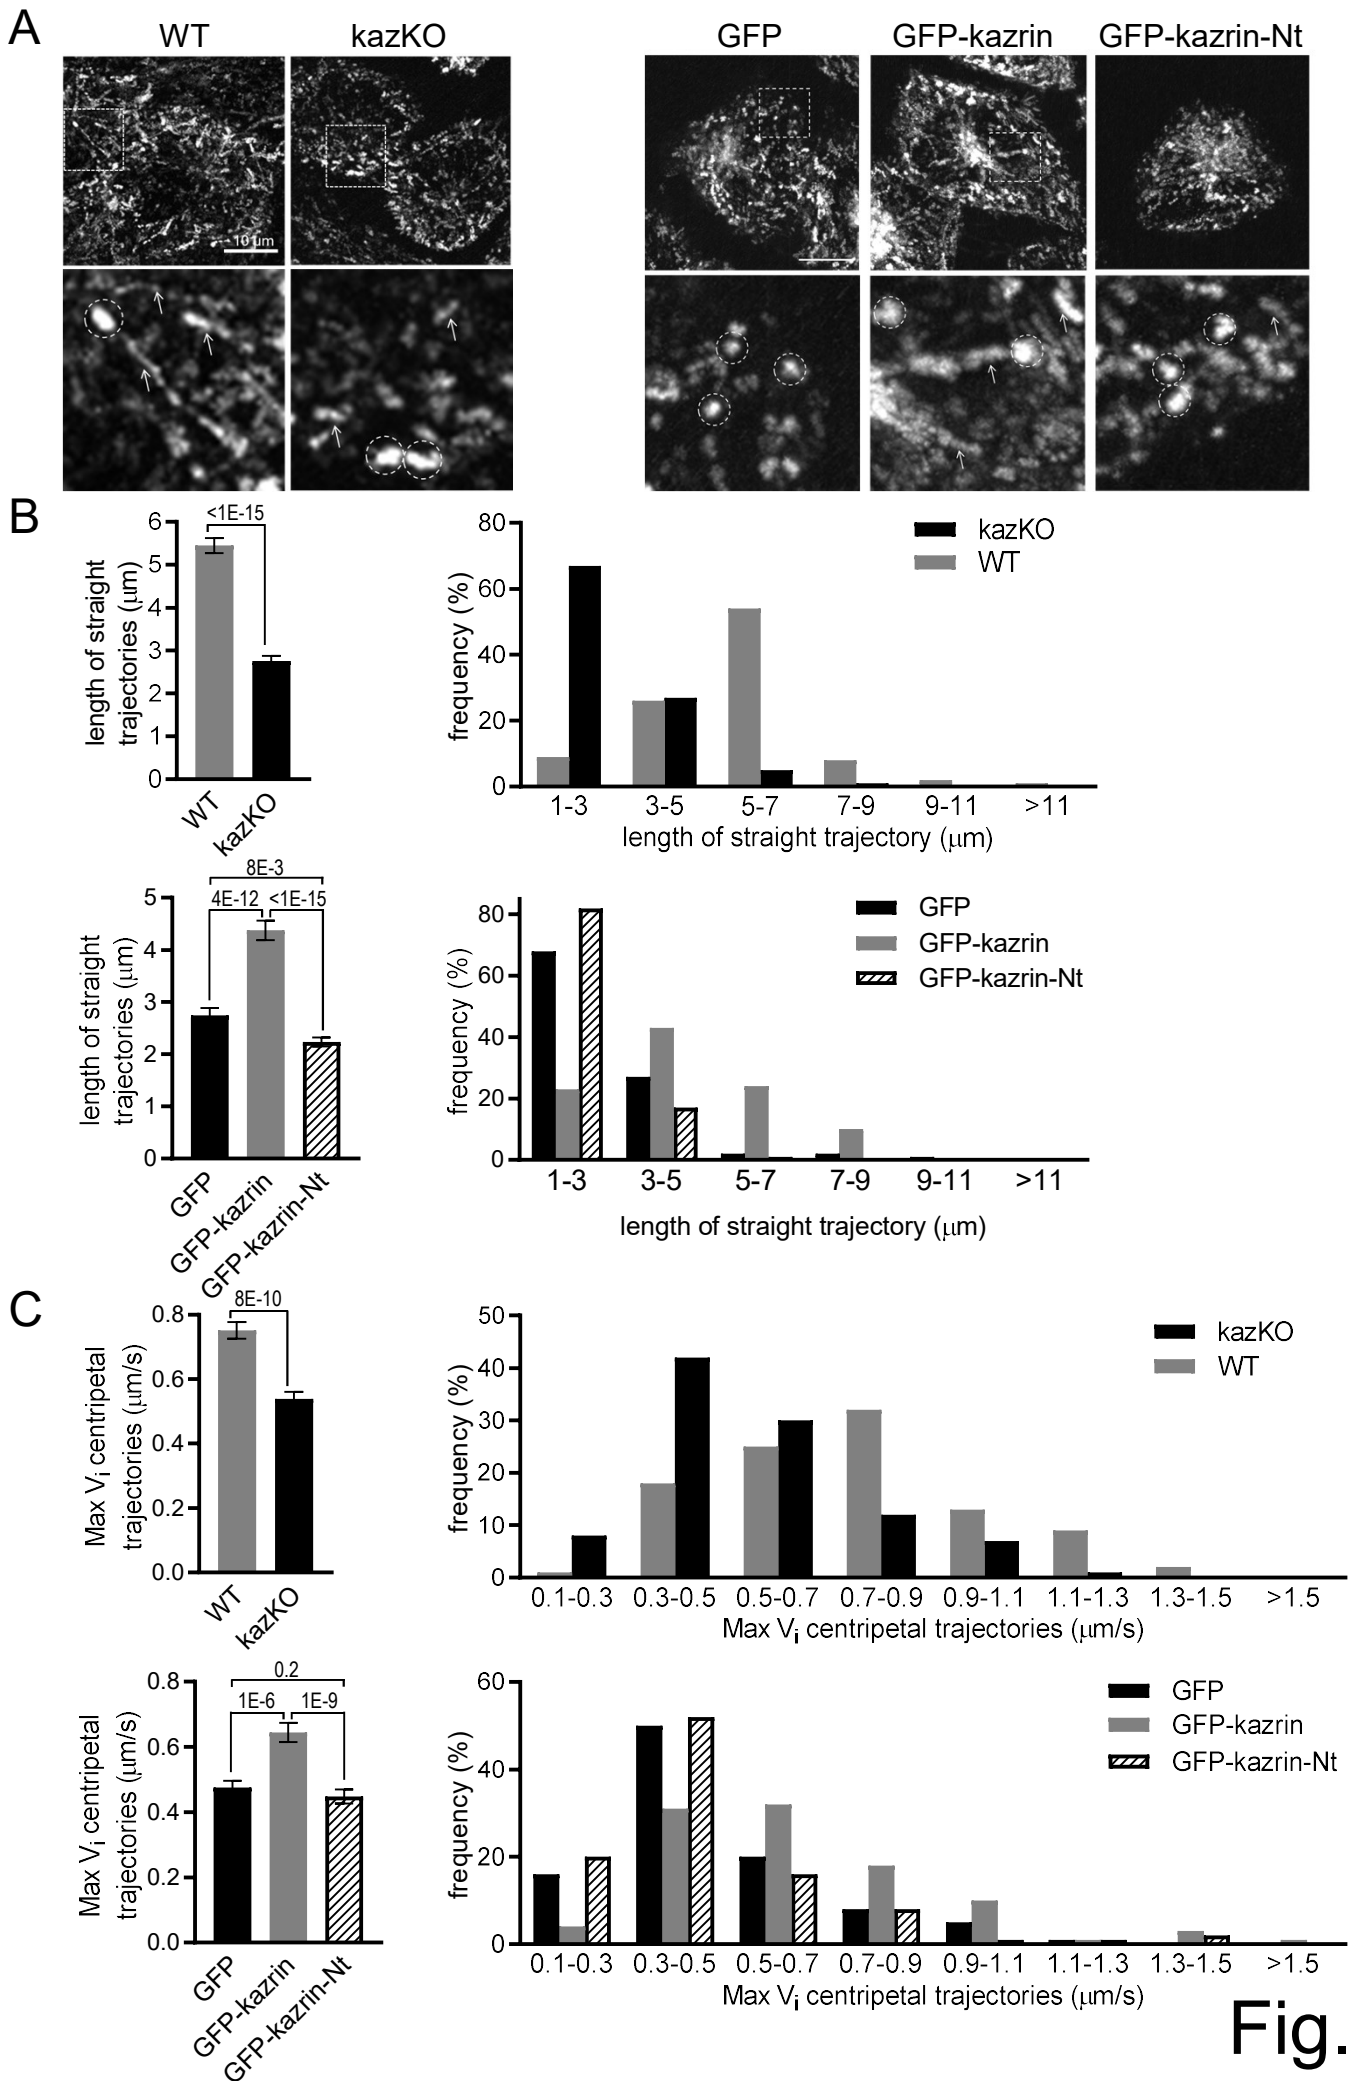

**Fig. 6**

1 **Supplementary data**

2 **Figure S1.** (A) Immunoblot against kazrin of protein extracts from Cos-7 cells either WT  
3 or expressing a non-target control shRNA (shCTR) or a shRNA against kazrin (shKaz).  
4 Proteins were extracted four days upon transduction and selection with puromycin. 18 µg of  
5 total protein extract was loaded per lane. The immunoblot was decorated with a polyclonal  
6 rabbit serum against the N-terminus of kazrin C. (B) Maximum intensity projections of  
7 confocal fluorescence micrographs showing either WT Cos-7 cells, or Cos-7 cell lines  
8 expressing a non-target control shRNA (shCTR) or a shRNA against kazrin (shKaz). Cells  
9 were exposed to Tfn-Alexa647 (A647-Tfn) for 2 hours before fixation. Dashed lines  
10 indicate the cell periphery. Bar, 10 µm. (C) Mean ± SEM of A647-Tfn fluorescence  
11 intensity accumulated per cell (left) or A647-Tfn perinuclear enrichment (right) after 2  
12 hours incubation. For the A647-Tfn accumulation (left), the data was normalized to the  
13 mean value of the shkaz treated cells. p values of two-tailed Student t tests are shown. n >  
14 25. For the perinuclear enrichment (right), the mean fluorescence intensity within a circle  
15 of 10 µm in the perinuclear region was quantified and divided by the total signal in the cell.  
16 The perinuclear enrichment data is normalized to the average of the shkaz treated cells. p  
17 values of two-tailed Student t tests are shown. n > 13 for each sample. (D) Strategy for the  
18 establishment of kazKO MEFs created with the CRISPR-Cas9 technology. The gRNA was  
19 designed to recognize a sequence at the beginning of exon 2 of the mouse Kazn gene, after  
20 the initiation codon of kazrin C, and followed by a PAM site. The CAS9 nuclease gene was  
21 transfected in a plasmid into the cells, together with the gRNA. CAS9 cleavage often leads  
22 to a frameshift mutation that impedes the expression of the gene. The plasmid encoding the  
23 gRNA and the CAS9 also encodes GFP, which allows sorting and isolation of transfected  
24 cells by FACS. The resulting clones were analysed by immunoblot, and those with no

25 kazrin expression were selected. One of them was used as the base for another three cell  
26 lines in which genes encoding GFP or GFP-kazrin C were inserted in the genome. The  
27 inserted constructs were preceded by a tetracycline-response element. This was achieved by  
28 lentiviral transduction and selection by FACS. Thus, none of these cell lines have  
29 endogenous kazrin expression but expresses GFP or GFP-kazrin C upon doxycycline  
30 addition. **(E)** Immunoblots of cell lysates from WT and kazKO MEF or kazKO MEFs  
31 expressing GFP and GFP-kazrin C, in the presence (+) or absence (-) of 5  $\mu\text{g/ml}$   
32 doxycycline for 24 h (dox). The membranes were probed with a polyclonal rabbit serum  
33 against the N-terminus of kazrin C,  $\alpha$ -GFP or stained with Ponceau red (as a loading  
34 control). A high and a low exposure for the kazrin signal are shown. **(F)** Confocal images  
35 of WT and kazKO MEF incubated for 10 minutes with 20  $\mu\text{g/ml}$  TxR-Tfn at 37°C. Bar, 10  
36  $\mu\text{m}$ . **(G)** Mean  $\pm$  SEM TxR-Tfn fluorescence intensity per cell for WT and kazKO cells.  
37 The fluorescence intensity in WT and kazKO cells was normalized to the mean value of the  
38 kazKO cells. The p value of a Mann Whitney test is shown.  $n > 100$  for each sample. **(H)**  
39 Confocal images of GFP-kazrin C kazKO MEFs in the presence (+) or absence (-) of 5  
40  $\mu\text{g/ml}$  doxycycline for 24 h (dox). Scale bar, 10  $\mu\text{m}$ . **(I)** Confocal images of WT and  
41 kazKO MEFs, fixed and stained with  $\alpha$ -RAB11 and A488-conjugated secondary antibodies.  
42 The dashed lines indicate the cell periphery. The position of the nucleus is indicated in  
43 blue. **(J)** Mean  $\pm$  SEM RAB11 perinuclear enrichment. The mean fluorescence intensity  
44 signal within a circle of 9  $\mu\text{m}$  in the perinuclear region was quantified and divided by the  
45 RAB11 signal in the cell. The data was normalized to the mean of the kazKO cells. p  
46 values of two-tailed Student t tests are shown.  $n > 29$  for each sample.

47 **Figure S2. (A)** Mean  $\pm$  SEM directionality ratio of individually migrating WT and kazKO  
48 or kazKO MEF expressing low levels of GFP or GFP-kazrin C. The cells were embedded



49 in Matrigel and tracked for 9 hours. The data was normalized to the corresponding kazKO  
50 cells. p values of two-tailed Mann-Whitney tests are shown. n > 155 per condition. **(B)**  
51 Immunoblots of an Optiprep density gradient fractionation of membrane lysates of Cos7  
52 cells, probed with  $\alpha$ -kazrin and  $\alpha$ -EEA1 antibodies. **(C)** Immunoblot of protein A-  
53 Sepharose precipitates from WT or kazKO MEFs or Cos7 cells using a mixed serum  
54 against the N and the C-terminal portions of kazrin C or a pre-immunisation serum, probed  
55 with an  $\alpha$ - $\gamma$ -adaptin or  $\alpha$ -Clathrin Heavy Chain (CHC) antibodies. Endogenous kazrin could  
56 not be detected with any of the tested antibodies in the immunoprecipitates because the  
57 antibody chain has a molecular weight similar to that of kazrin (approx. 50 Kda). kazKO  
58 MEF were used as specificity control instead.

59 **Figure S3.** **(A)** Ponceau red staining (lower panels) and immunoblots against GFP of WT  
60 and kazKO MEFs, or kazKO cells expressing GFP-Kazrin C or a GFP-Kazrin C construct  
61 lacking the IDR (GFP-kazrin-Nt) in the absence (-) or presence (+) of of 5  $\mu$ g/ml  
62 doxycycline for 24 h (dox). **(B)** Merged confocal images of kazKO MEFs expressing  
63 moderate levels of GFP or GFP-kazrin C, fixed and stained with  $\alpha$ -N-cadherin,  $\alpha$ - $\beta$ -catenin,  
64  $\alpha$ -p120-catenin or  $\alpha$ -desmogelin antibodies and adequate A568-conjugated secondary  
65 antibodies. Merged images and individual channels of 8x magnifications are shown. Scale  
66 bar, 10  $\mu$ m. **(C)** Maximum intensity projections of merged confocal images of kazKO  
67 MEFs expressing moderate levels of GFP or GFP-kazrin C (GFP-kaz), fixed and stained  
68 with  $\alpha$ -EHD1 or  $\alpha$ - $\gamma$ -adaptin and A568-conjugated secondary antibodies. Individual  
69 channels and merged images of 5 x 5  $\mu$ m<sup>2</sup> insets are shown on the right. **(D)** 2.65 second  
70 time-lapse confocal images of the perinuclear region of kazKO MEFs expressing moderate  
71 levels of GFP-kazrin C, Scale bar, 2  $\mu$ m.

72 **Movie S1.** Videos of individually migrating WT and kazKO MEF, and kazKO MEF  
73 expressing low levels of GFP and GFP-kazrin C. The cells were embedded in Matrigel and  
74 imaged with an epifluorescence microscope.

75 **Movie S2.** Videos of dividing WT and kazKO MEF, and kazKO MEF expressing low  
76 levels of GFP and GFP-kazrin C, from the moment the mother cell attached to the substrate  
77 until the daughter cells were completely separated. The cells were embedded in Matrigel  
78 and imaged with an epifluorescence microscope.

79 **Movies S3 to S6.** 3D reconstructions Z stacks of kazKO MEF expressing moderate  
80 amounts of GFP-kazrin C loaded with TxR-Tfn at 16°C to accumulate endocytic cargo in  
81 EEs. Cells were shifted to 37°C and fixed after 10 minutes. The window is 5 x 5  $\mu\text{m}^2$ .

82 **Movies S7 to S10.** 3D reconstructions of Z stacks of kazKO MEF expressing moderate  
83 amounts of GFP-kazrin C, fixed and stained with  $\alpha$ -EHD1 and A568-conjugated secondary  
84 antibodies. The window is 5 x 5  $\mu\text{m}^2$ .

85 **Movies S11 to S14.** 3D reconstructions of Z stacks of kazKO cells expressing moderate  
86 amounts of a GFP-kazrin C lacking the C-terminal predicted IDR (GFP-kazrin C-Nt)  
87 loaded with TxR-Tfn at 16°C to accumulate endocytic cargo in EE. Cells were shifted to  
88 37°C and fixed after 10 minutes. The window is 5 x 5  $\mu\text{m}^2$ .

89 **Movies S15 & S16.** 3D reconstructions of Z stacks of kazKO cells expressing moderate  
90 amounts of GFP, loaded with TxR-Tfn at 16°C to accumulate endocytic cargo in EE. Cells  
91 were shifted to 37°C and fixed after 10 minutes. The window is 5 x 5  $\mu\text{m}^2$ .

92 **Movie S17.** 2.65 seconds time-lapse video of the perinuclear region of a kazKO MEF  
93 moderately expressing GFP-kazrin C (GFP-kaz) with a confocal microscopy. Scale bar, 2  
94  $\mu\text{m}$ .

95 **Movie S18.** 3 seconds time-lapse live-cell movies showing TxR-Tfn loaded endosomal  
96 dynamics in WT MEF. The window is  $10 \times 10 \mu\text{m}^2$ . Cells were loaded with TxR-Tfn at  
97  $16^\circ\text{C}$  to accumulate endocytic cargo in EEs and imaged immediately after shift to  $37^\circ\text{C}$ .  
98 The image corresponds to the maximum intensity Z projection.

99 **Movie S19.** 3 seconds time-lapse live-cell movies showing TxR-Tfn loaded endosomal  
100 dynamics in kazKO MEF. The window is  $10 \times 10 \mu\text{m}^2$ . Cells were loaded with TxR-Tfn at  
101  $16^\circ\text{C}$  to accumulate endocytic cargo in EEs and imaged immediately after shift to  $37^\circ\text{C}$ .  
102 The image corresponds to the maximum intensity Z projection.

103 **Movie S20.** 3 seconds time-lapse live-cell movies showing TxR-Tfn loaded endosomal  
104 dynamics in kazKO MEF expressing low levels of GFP. The window is  $10 \times 10 \mu\text{m}^2$ . Cells  
105 were loaded with TxR-Tfn at  $16^\circ\text{C}$  to accumulate endocytic cargo in EEs and imaged  
106 immediately after shift to  $37^\circ\text{C}$ . The image corresponds to the maximum intensity Z  
107 projection.

108 **Movie S21.** 3 seconds time-lapse live-cell movies showing TxR-Tfn loaded endosomal  
109 dynamics in kazKO MEF expressing low levels of GFP-kazrin C. The window is  $10 \times 10$   
110  $\mu\text{m}^2$ . Cells were loaded with TxR-Tfn at  $16^\circ\text{C}$  to accumulate endocytic cargo in EEs and  
111 imaged immediately after shift to  $37^\circ\text{C}$ . The image corresponds to the maximum intensity Z  
112 projection.

113 **Movie S22.** 3 seconds time-lapse live-cell movies showing TxR-Tfn loaded endosomal  
114 dynamics in kazKO MEF expressing low levels of a GFP-kazrin C construct lacking the C-  
115 terminal predicted IDR (GFP-kazrin c-Nt). The window is  $10 \times 10 \mu\text{m}^2$ . Cells were loaded  
116 with TxR-Tfn at  $16^\circ\text{C}$  to accumulate endocytic cargo in EEs and imaged immediately after  
117 shift to  $37^\circ\text{C}$ . The image corresponds to the maximum intensity Z projection.

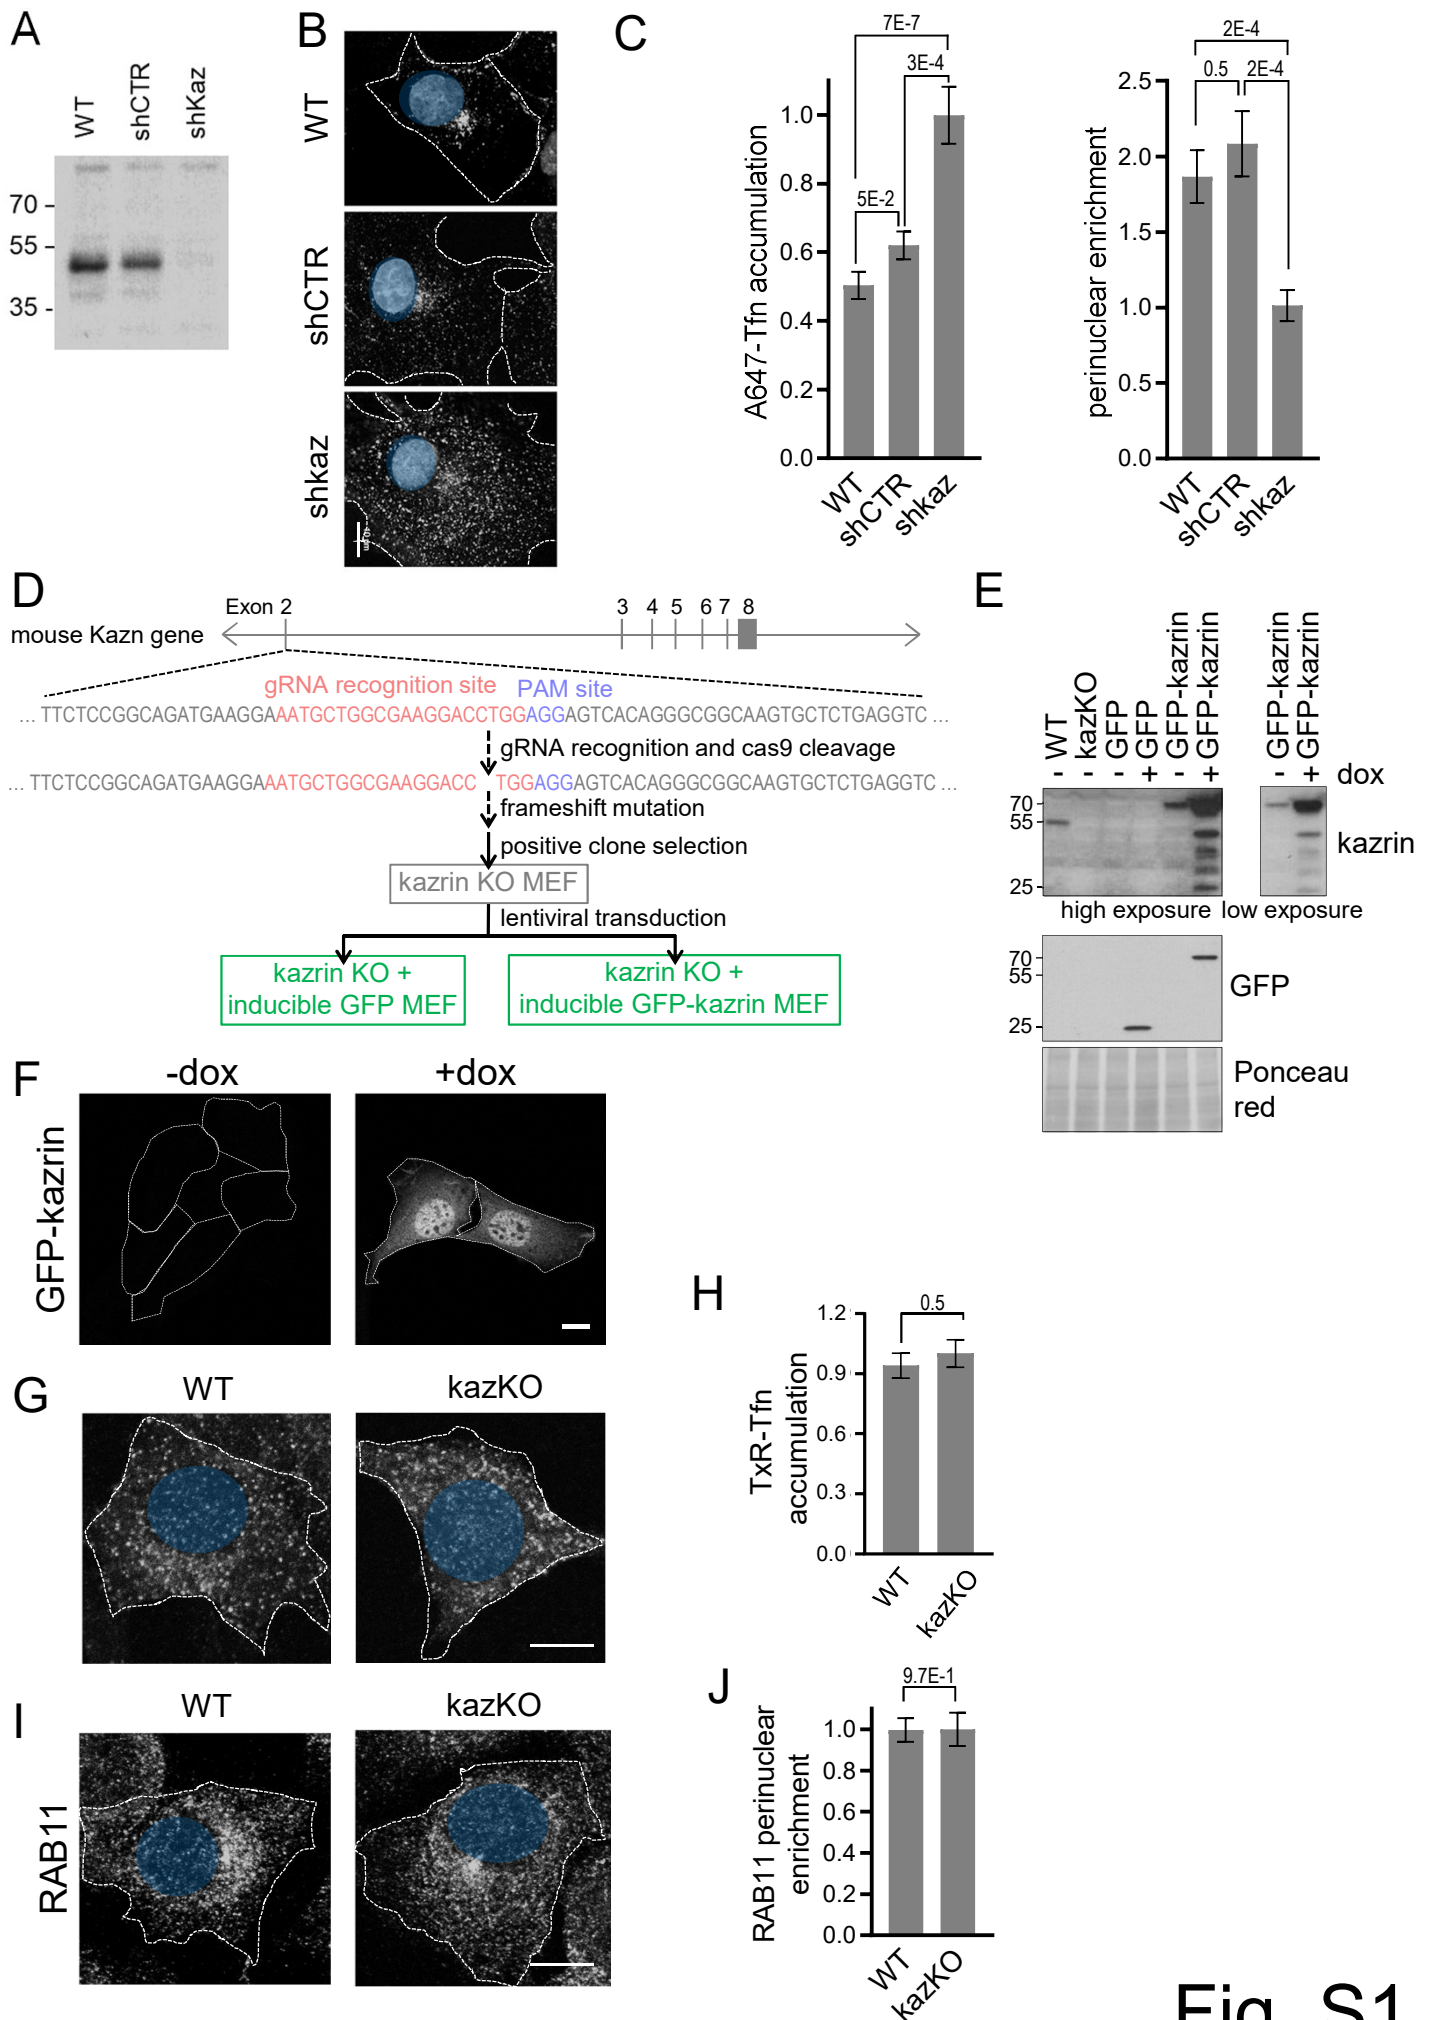

Fig. S1

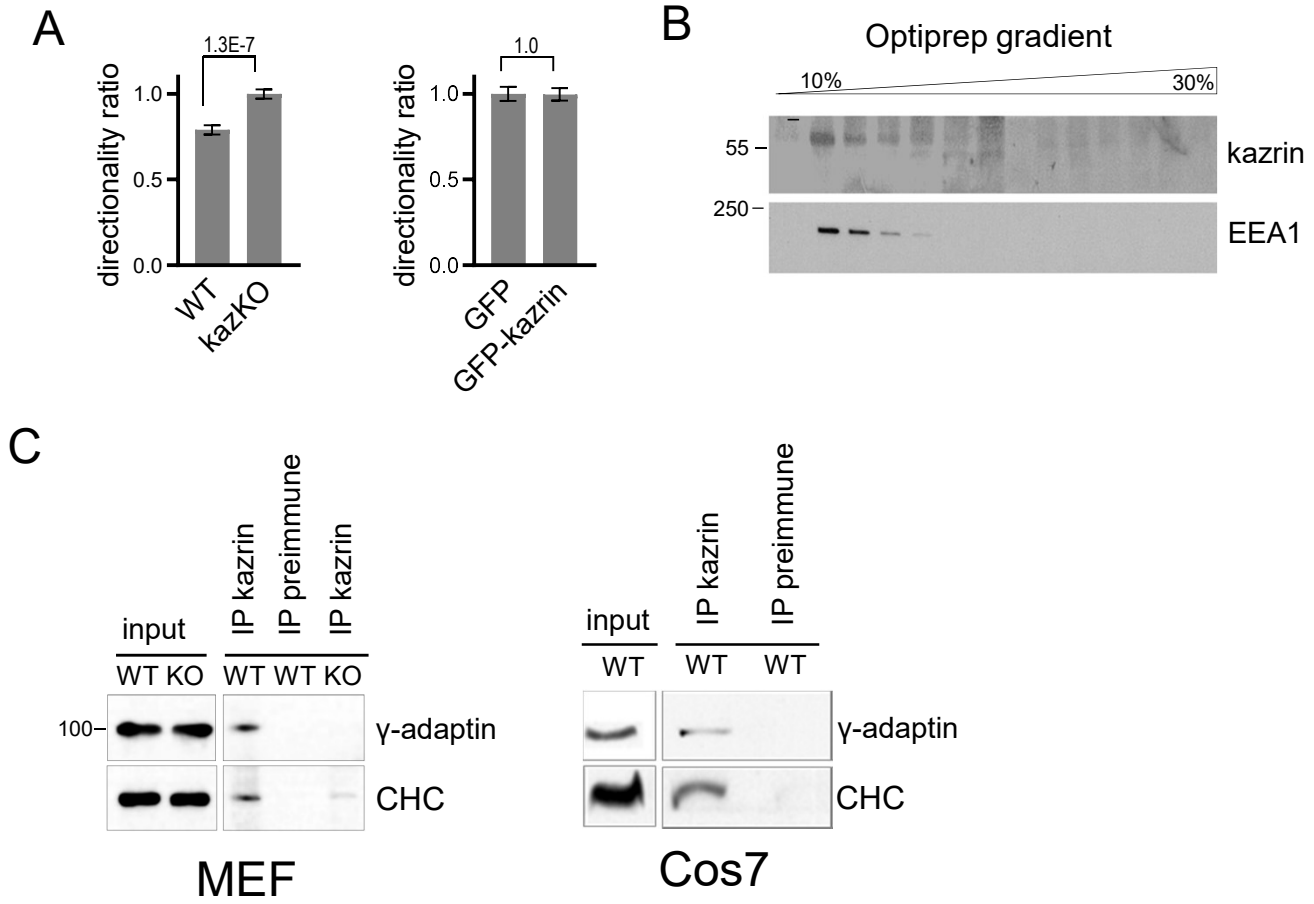

Fig. S2

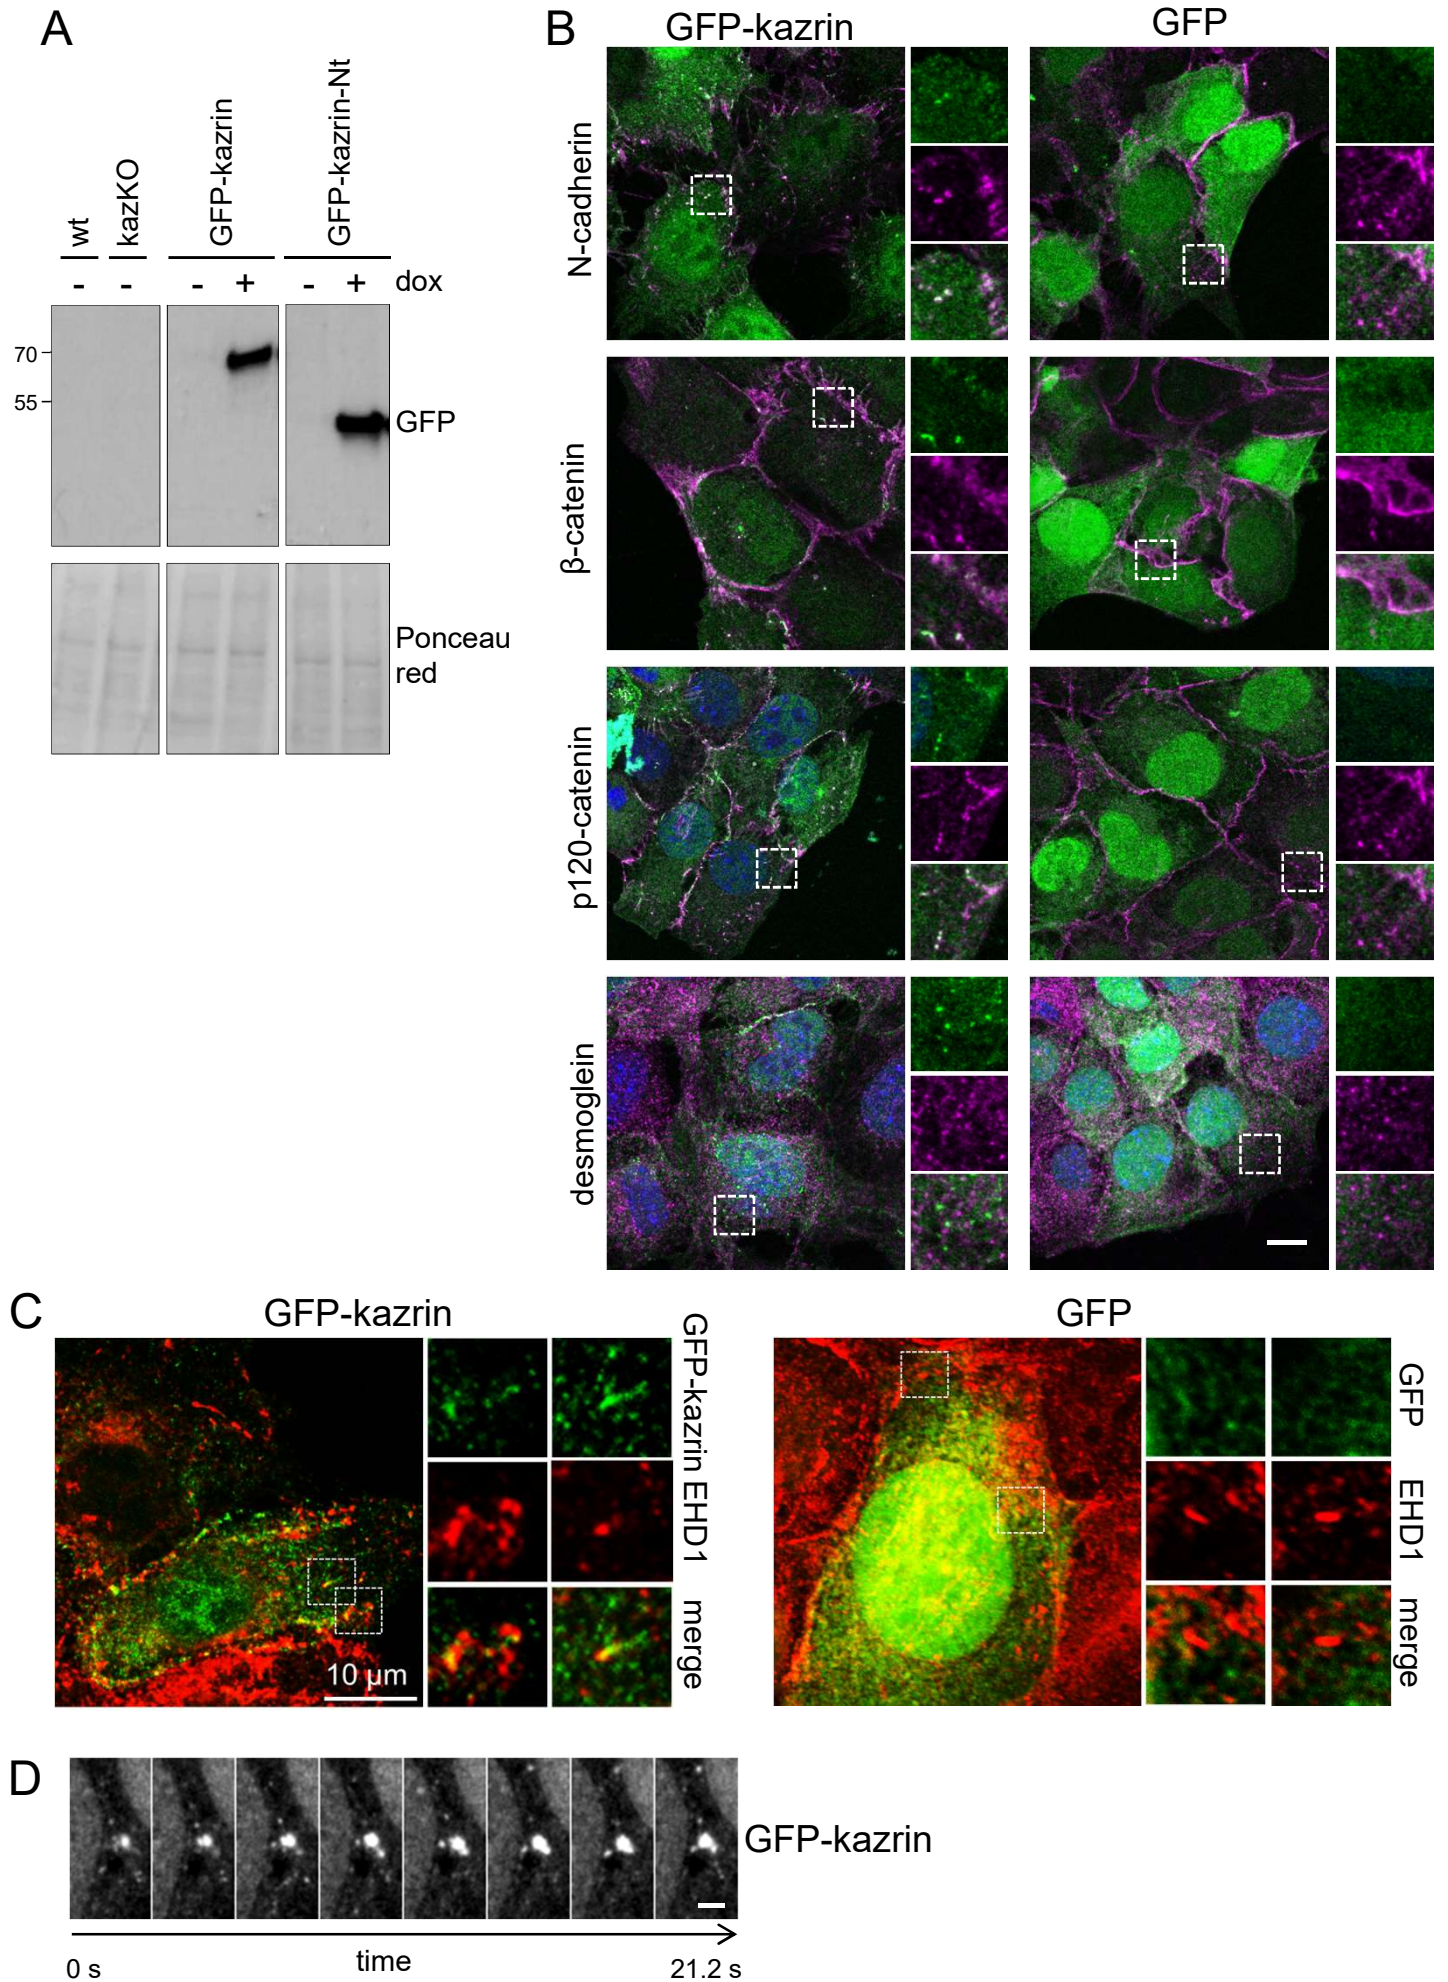

Fig. S3
